# Supplementary material
Source: publisher site journal article supplement (http://www.spandidos-publications.com/1031/downloadSupplementary)
Supplement: Supplementary file 1 [file downloadSupplementary]

## Sheet: Sheet1
Table S5. DEGs between the high- and low-risk groups were also identified in the discovery and validation cohorts.
GSE58812	FDR<0.05				GSE19615
mRNA	P-value	DEG	FDR		mRNA	P-value	DEG	FDR
27074	1.24e-15	-1	9.86e-12		114769	5.03e-07	-1	0.00802489
256586	9.36e-16	-1	9.86e-12		1230	1.11e-06	-1	0.00884412
25939	2.86e-15	-1	1.52e-11		330	2.9e-05	-1	0.0262468
5552	3.06e-14	-1	1.22e-10		4332	2.77e-05	-1	0.0262468
51056	5.54e-14	-1	1.72e-10		7737	6.76e-06	-1	0.0262468
116071	6.48e-14	-1	1.72e-10		10308	1.93e-05	-1	0.0262468
3430	1.08e-13	-1	2.15e-10		10447	2.93e-05	-1	0.0262468
9447	1.04e-13	-1	2.15e-10		23087	2.96e-05	-1	0.0262468
3134	1.43e-13	-1	2.53e-10		27237	1.67e-05	1	0.0262468
5698	1.78e-13	-1	2.83e-10		51667	2.14e-05	-1	0.0262468
10673	3.68e-13	-1	5.34e-10		55016	7.38e-06	-1	0.0262468
5588	4.69e-13	-1	6.24e-10		55174	1.74e-05	-1	0.0262468
3659	5.34e-13	-1	6.54e-10		84124	1.45e-05	-1	0.0262468
5696	6.1e-13	-1	6.62e-10		120534	2.33e-05	-1	0.0262468
26157	6.23e-13	-1	6.62e-10		168455	1.21e-05	-1	0.0262468
3002	8.26e-13	-1	8.23e-10		256586	9e-06	-1	0.0262468
81030	1.19e-12	-1	1.11e-09		284403	2.91e-05	1	0.0262468
10563	1.52e-12	-1	1.21e-09		474344	1.53e-05	-1	0.0262468
55016	1.37e-12	-1	1.21e-09		26157	3.62e-05	-1	0.0263935
129607	1.5e-12	-1	1.21e-09		114548	3.47e-05	-1	0.0263935
9246	1.62e-12	-1	1.23e-09		123099	3.22e-05	1	0.0263935
54625	1.88e-12	-1	1.31e-09		254170	3.64e-05	-1	0.0263935
219285	1.86e-12	-1	1.31e-09		6672	4.11e-05	-1	0.0284695
2841	2.02e-12	-1	1.34e-09		80183	4.29e-05	-1	0.0284695
6402	3.4e-12	-1	2.08e-09		834	6.4e-05	-1	0.0287609
197259	3.38e-12	-1	2.08e-09		2124	6.43e-05	-1	0.0287609
4940	3.71e-12	-1	2.19e-09		5912	4.71e-05	-1	0.0287609
29909	3.98e-12	-1	2.26e-09		6197	5.21e-05	-1	0.0287609
84166	4.84e-12	-1	2.66e-09		9447	6.16e-05	-1	0.0287609
8477	5.22e-12	-1	2.68e-09		9595	4.83e-05	-1	0.0287609
29851	5.14e-12	-1	2.68e-09		10318	5.82e-05	-1	0.0287609
8807	6.06e-12	-1	2.99e-09		10600	5.48e-05	-1	0.0287609
24138	6.24e-12	-1	2.99e-09		23484	6.49e-05	-1	0.0287609
115361	6.37e-12	-1	2.99e-09		51284	5.47e-05	-1	0.0287609
3702	7.17e-12	-1	3.11e-09		55741	6.14e-05	-1	0.0287609
4939	7.21e-12	-1	3.11e-09		387119	5.89e-05	-1	0.0287609
10346	6.97e-12	-1	3.11e-09		168537	7.25e-05	-1	0.0312204
55619	7.43e-12	-1	3.12e-09		51073	7.78e-05	-1	0.0326565
5026	9.33e-12	-1	3.72e-09		23179	8e-05	-1	0.032683
201633	9.22e-12	-1	3.72e-09		1193	0.000107051	-1	0.033758
124460	1.03e-11	-1	4.01e-09		1880	9.35e-05	-1	0.033758
57674	1.16e-11	-1	4.39e-09		2213	0.00011049	-1	0.033758
94240	1.26e-11	-1	4.67e-09		2769	9.5e-05	-1	0.033758
1439	1.33e-11	-1	4.81e-09		3428	0.00011348	-1	0.033758
27299	1.42e-11	-1	5.05e-09		6352	8.5e-05	-1	0.033758
3937	1.46e-11	-1	5.05e-09		6553	0.000109175	1	0.033758
203328	1.87e-11	-1	6.33e-09		8477	0.000116165	-1	0.033758
51316	1.96e-11	-1	6.5e-09		22797	9.12e-05	-1	0.033758
22797	2.57e-11	-1	8.18e-09		55303	0.000111683	-1	0.033758
64407	2.55e-11	-1	8.18e-09		55843	8.87e-05	-1	0.033758
3560	2.66e-11	-1	8.33e-09		57621	9.77e-05	-1	0.033758
55843	2.73e-11	-1	8.37e-09		60489	0.000111199	-1	0.033758
81704	3.25e-11	-1	9.78e-09		84541	0.000116465	-1	0.033758
64108	3.69e-11	-1	1.09e-08		92241	0.000116111	-1	0.033758
952	3.88e-11	-1	1.11e-08		134430	9.57e-05	-1	0.033758
4599	3.87e-11	-1	1.11e-08		55916	0.000118947	-1	0.0338617
1236	4.07e-11	-1	1.14e-08		4067	0.000121882	-1	0.0339118
942	4.16e-11	-1	1.14e-08		10125	0.000123378	-1	0.0339118
151888	4.7e-11	-1	1.27e-08		11010	0.000126946	-1	0.0343012
3620	4.96e-11	-1	1.28e-08		2123	0.00013031	-1	0.0346233
4068	4.86e-11	-1	1.28e-08		259	0.000139876	1	0.0359661
6772	4.98e-11	-1	1.28e-08		54149	0.000138874	-1	0.0359661
114769	5.15e-11	-1	1.3e-08		54850	0.000150841	-1	0.03817
50852	5.32e-11	-1	1.32e-08		54556	0.000154685	-1	0.038531
64092	6.06e-11	-1	1.49e-08		340348	0.000157434	-1	0.0386124
969	7.12e-11	-1	1.72e-08		7412	0.000160846	-1	0.0388516
10875	7.4e-11	-1	1.76e-08		84674	0.000169988	-1	0.040447
7456	7.77e-11	-1	1.8e-08		954	0.000190467	1	0.0406032
51379	7.78e-11	-1	1.8e-08		1439	0.000211842	-1	0.0406032
9595	8.01e-11	-1	1.82e-08		2534	0.000219595	-1	0.0406032
9214	8.19e-11	-1	1.84e-08		2622	0.000199635	1	0.0406032
3431	8.96e-11	-1	1.98e-08		3820	0.00022155	-1	0.0406032
3600	9.54e-11	-1	2.08e-08		5597	0.000216362	-1	0.0406032
6891	1.04e-10	-1	2.25e-08		6102	0.000229139	-1	0.0406032
55303	1.1e-10	-1	2.35e-08		6503	0.000181005	-1	0.0406032
53347	1.16e-10	-1	2.44e-08		7133	0.000206937	-1	0.0406032
5579	1.28e-10	-1	2.64e-08		7675	0.000229224	-1	0.0406032
919	1.29e-10	-1	2.64e-08		7703	0.000215432	1	0.0406032
441168	1.41e-10	-1	2.84e-08		9934	0.000179047	-1	0.0406032
80833	1.43e-10	-1	2.85e-08		10875	0.000216816	-1	0.0406032
3683	1.53e-10	-1	3.01e-08		23228	0.000226188	-1	0.0406032
60489	1.67e-10	-1	3.24e-08		25816	0.00018168	-1	0.0406032
1234	1.72e-10	-1	3.27e-08		27074	0.000228552	-1	0.0406032
10964	1.72e-10	-1	3.27e-08		29909	0.000198518	-1	0.0406032
3105	1.78e-10	-1	3.33e-08		51338	0.000184725	-1	0.0406032
51191	1.92e-10	-1	3.57e-08		51634	0.000205627	-1	0.0406032
912	2.24e-10	-1	4.11e-08		56146	0.000219227	1	0.0406032
2633	2.49e-10	-1	4.51e-08		83480	0.000202576	-1	0.0406032
7133	2.54e-10	-1	4.55e-08		124402	0.000224633	1	0.0406032
834	2.57e-10	-1	4.56e-08		196383	0.000224667	-1	0.0406032
10666	2.65e-10	-1	4.64e-08		4689	0.000234509	-1	0.0410458
2124	2.75e-10	-1	4.66e-08		10346	0.000239446	-1	0.0410458
3437	2.71e-10	-1	4.66e-08		55196	0.000238689	-1	0.0410458
3660	2.73e-10	-1	4.66e-08		3575	0.000243522	-1	0.0411765
6352	2.81e-10	-1	4.72e-08		219285	0.000245375	-1	0.0411765
914	2.88e-10	-1	4.75e-08		226	0.000251393	1	0.0413166
3902	2.89e-10	-1	4.75e-08		200315	0.000250783	-1	0.0413166
3601	2.97e-10	-1	4.78e-08		90459	0.000267048	-1	0.0430027
84941	2.95e-10	-1	4.78e-08		124460	0.000265313	-1	0.0430027
26034	3.49e-10	-1	5.57e-08		219972	0.000274192	-1	0.0437118
3627	3.59e-10	-1	5.65e-08		969	0.000277301	-1	0.0437696
3669	3.62e-10	-1	5.65e-08		25842	0.000281044	-1	0.0439255
56253	4.32e-10	-1	6.68e-08		3594	0.00030712	-1	0.0467584
7453	4.45e-10	-1	6.83e-08		10855	0.000306697	-1	0.0467584
51703	4.76e-10	-1	7.23e-08		26191	0.000307968	-1	0.0467584
6373	5.1e-10	-1	7.67e-08		120	0.00031542	-1	0.0471867
26191	5.24e-10	-1	7.81e-08		154743	0.000316709	-1	0.0471867
3587	6.35e-10	-1	9.28e-08		287	0.000325551	-1	0.0475093
84541	6.3e-10	-1	9.28e-08		669	0.000339735	-1	0.0475093
10578	6.65e-10	-1	9.61e-08		6039	0.000338842	-1	0.0475093
55601	6.69e-10	-1	9.61e-08		9535	0.000329661	-1	0.0475093
915	6.77e-10	-1	9.63e-08		50846	0.000338042	1	0.0475093
221472	6.85e-10	-1	9.66e-08		51316	0.000332954	-1	0.0475093
917	7.38e-10	-1	1.02e-07		729230	0.000325309	-1	0.0475093
1438	7.33e-10	-1	1.02e-07		28984	0.000345151	-1	0.0477733
4033	7.79e-10	-1	1.07e-07		55281	0.000347617	-1	0.0477733
30009	8.05e-10	-1	1.1e-07		11314	0.00035105	-1	0.0478329
11151	8.36e-10	-1	1.12e-07		57156	0.000362769	1	0.0485989
80709	8.29e-10	-1	1.12e-07		64231	0.000359913	-1	0.0485989
64333	8.44e-10	-1	1.12e-07		129607	0.00036631	-1	0.0486643
27334	8.91e-10	-1	1.17e-07		5168	0.000376651	-1	0.0495224
10663	9.31e-10	-1	1.22e-07		26007	0.000378982	1	0.0495224
79961	1.01e-09	-1	1.31e-07		11093	0.000386905	1	0.0501467
963	1.11e-09	-1	1.43e-07		3717	0.000406516	-1	0.0502378
695	1.13e-09	-1	1.44e-07		10179	0.000398996	-1	0.0502378
3575	1.14e-09	-1	1.44e-07		10813	0.000393421	-1	0.0502378
4050	1.21e-09	-1	1.5e-07		155382	0.000400631	1	0.0502378
116442	1.21e-09	-1	1.5e-07		286410	0.000402988	-1	0.0502378
931	1.36e-09	-1	1.68e-07		647087	0.000406247	-1	0.0502378
340152	1.4e-09	-1	1.72e-07		1236	0.000440742	-1	0.0524352
5272	1.49e-09	-1	1.81e-07		4792	0.000440586	-1	0.0524352
10384	1.54e-09	-1	1.85e-07		27299	0.000431911	-1	0.0524352
5880	1.57e-09	-1	1.89e-07		343702	0.000431915	1	0.0524352
80008	1.67e-09	-1	1.99e-07		375298	0.000439436	-1	0.0524352
55423	1.69e-09	-1	1.99e-07		5906	0.000469303	-1	0.0546104
5778	1.76e-09	-1	2.07e-07		27292	0.000463196	-1	0.0546104
940	1.87e-09	-1	2.18e-07		91694	0.000468304	-1	0.0546104
8638	1.99e-09	-1	2.3e-07		5568	0.000474358	1	0.0547677
5721	2.02e-09	-1	2.31e-07		23258	0.000477526	-1	0.0547677
147138	2.35e-09	-1	2.68e-07		26112	0.000491909	-1	0.0560143
219972	2.43e-09	-1	2.74e-07		4064	0.000495586	-1	0.0560329
1520	2.53e-09	-1	2.84e-07		9262	0.000518975	-1	0.0578567
26270	2.67e-09	-1	2.97e-07		79892	0.000517067	-1	0.0578567
197135	2.69e-09	-1	2.98e-07		152007	0.000526055	-1	0.0582386
5293	2.79e-09	-1	3.01e-07		253980	0.000537741	1	0.0587169
7294	2.8e-09	-1	3.01e-07		283897	0.00053476	-1	0.0587169
81793	2.8e-09	-1	3.01e-07		931	0.000573118	-1	0.062154
729230	2.8e-09	-1	3.01e-07		55631	0.000584941	-1	0.0630077
3594	2.88e-09	-1	3.07e-07		148398	0.000588942	1	0.0630129
4261	2.88e-09	-1	3.07e-07		929	0.000608223	-1	0.0630618
387357	3.05e-09	-1	3.22e-07		6304	0.000596349	-1	0.0630618
10659	3.23e-09	-1	3.38e-07		6373	0.000602966	-1	0.0630618
2533	3.36e-09	-1	3.5e-07		9435	0.000609178	-1	0.0630618
51131	3.43e-09	-1	3.55e-07		286530	0.000604096	-1	0.0630618
23526	3.49e-09	-1	3.59e-07		3059	0.000630552	-1	0.0648533
374403	3.59e-09	-1	3.67e-07		84502	0.000648672	1	0.0659905
653361	3.7e-09	-1	3.76e-07		84935	0.000649887	-1	0.0659905
3957	3.77e-09	-1	3.8e-07		917	0.000690076	-1	0.0666739
330	3.91e-09	-1	3.92e-07		2313	0.00066503	-1	0.0666739
8115	4.02e-09	-1	4.01e-07		3957	0.000672137	-1	0.0666739
170575	4.32e-09	-1	4.28e-07		8131	0.000675192	1	0.0666739
3820	4.36e-09	-1	4.29e-07		53405	0.000684671	-1	0.0666739
3001	4.52e-09	-1	4.42e-07		79132	0.000676235	-1	0.0666739
752	4.57e-09	-1	4.44e-07		91526	0.000679325	-1	0.0666739
3059	4.7e-09	-1	4.51e-07		401494	0.0006886	-1	0.0666739
4332	4.68e-09	-1	4.51e-07		10943	0.000697547	-1	0.0669897
375298	4.78e-09	-1	4.56e-07		9770	0.000713981	-1	0.0677546
51513	5.03e-09	-1	4.77e-07		57559	0.000714012	-1	0.0677546
168537	5.67e-09	-1	5.35e-07		3394	0.000726203	-1	0.0681007
286530	7.03e-09	-1	6.59e-07		201633	0.000725786	-1	0.0681007
497189	7.42e-09	-1	6.91e-07		4005	0.000745402	-1	0.0694924
50615	7.52e-09	-1	6.97e-07		138311	0.000750983	1	0.0696057
4283	7.82e-09	-1	7.2e-07		8767	0.000766303	-1	0.070615
11184	8.12e-09	-1	7.44e-07		608	0.000783423	-1	0.0715925
55008	8.27e-09	-1	7.54e-07		6782	0.000785891	-1	0.0715925
151636	8.58e-09	-1	7.77e-07		3133	0.000823014	-1	0.0725429
4067	8.74e-09	-1	7.83e-07		6469	0.000828177	1	0.0725429
139716	8.7e-09	-1	7.83e-07		8539	0.000811377	-1	0.0725429
1536	9.1e-09	-1	8.1e-07		11151	0.000809961	-1	0.0725429
930	9.22e-09	-1	8.12e-07		91782	0.000805624	-1	0.0725429
51411	9.21e-09	-1	8.12e-07		221786	0.000825132	-1	0.0725429
83666	9.63e-09	-1	8.43e-07		257106	0.000816323	-1	0.0725429
3932	1.02e-08	-1	8.88e-07		9473	0.000845929	-1	0.0736023
53829	1.03e-08	-1	8.88e-07		54529	0.000849506	-1	0.0736023
2833	1.07e-08	-1	9.21e-07		199	0.000879052	-1	0.0738823
1075	1.09e-08	-1	9.32e-07		2841	0.000889813	-1	0.0738823
79132	1.11e-08	-1	9.5e-07		3932	0.000889249	-1	0.0738823
6039	1.12e-08	-1	9.53e-07		5272	0.000873103	-1	0.0738823
2643	1.2e-08	-1	1.01e-06		8934	0.000887817	-1	0.0738823
925	1.24e-08	-1	1.04e-06		26278	0.000860634	-1	0.0738823
10235	1.29e-08	-1	1.08e-06		51131	0.000873352	-1	0.0738823
974	1.37e-08	-1	1.13e-06		79648	0.000874821	-1	0.0738823
93349	1.39e-08	-1	1.15e-06		915	0.00090398	-1	0.0740642
356	1.45e-08	-1	1.19e-06		3587	0.000915233	-1	0.0740642
283897	1.48e-08	-1	1.21e-06		6402	0.000903922	-1	0.0740642
51284	1.51e-08	-1	1.23e-06		29883	0.000913883	-1	0.0740642
64135	1.55e-08	-1	1.26e-06		51088	0.000914556	-1	0.0740642
3133	1.58e-08	-1	1.27e-06		2965	0.000967388	-1	0.0755686
4818	1.62e-08	-1	1.29e-06		23262	0.000941603	-1	0.0755686
79413	1.77e-08	-1	1.41e-06		23643	0.000949837	-1	0.0755686
91526	1.8e-08	-1	1.43e-06		24138	0.000945045	-1	0.0755686
1043	1.85e-08	-1	1.46e-06		51348	0.000969386	-1	0.0755686
10288	1.96e-08	-1	1.54e-06		57610	0.000972017	1	0.0755686
149111	1.99e-08	1	1.56e-06		64092	0.000976486	-1	0.0755686
3662	2.12e-08	-1	1.65e-06		64860	0.000963699	-1	0.0755686
3071	2.35e-08	-1	1.81e-06		65977	0.000960967	-1	0.0755686
5359	2.42e-08	-1	1.86e-06		1844	0.00101851	-1	0.076881
25816	2.51e-08	-1	1.93e-06		2064	0.00102378	1	0.076881
971	2.57e-08	-1	1.95e-06		3627	0.00101778	-1	0.076881
4600	2.57e-08	-1	1.95e-06		4300	0.000998436	-1	0.076881
5788	2.63e-08	-1	1.99e-06		9295	0.00101606	-1	0.076881
313	2.78e-08	-1	2.09e-06		10480	0.00101115	-1	0.076881
2123	2.97e-08	-1	2.22e-06		79156	0.0010272	-1	0.076881
4277	2.98e-08	-1	2.22e-06		1633	0.00104716	-1	0.0770125
3676	3.13e-08	-1	2.32e-06		5511	0.00104586	-1	0.0770125
3122	3.16e-08	-1	2.33e-06		7748	0.00104828	-1	0.0770125
4689	3.29e-08	-1	2.42e-06		9976	0.00103842	-1	0.0770125
3394	3.33e-08	-1	2.44e-06		10505	0.00107015	1	0.0779013
79368	3.38e-08	-1	2.46e-06		10978	0.00106725	-1	0.0779013
26279	3.42e-08	-1	2.48e-06		3087	0.00107691	-1	0.0780371
7409	3.57e-08	-1	2.58e-06		925	0.00108389	-1	0.0781872
2635	3.85e-08	-1	2.77e-06		1043	0.00111215	-1	0.079506
79958	3.91e-08	-1	2.79e-06		51703	0.00110947	-1	0.079506
3428	4.15e-08	-1	2.95e-06		203069	0.00111787	-1	0.079558
10800	4.2e-08	-1	2.97e-06		900	0.00113733	-1	0.0803868
11118	4.19e-08	-1	2.97e-06		11094	0.00113959	1	0.0803868
976	4.54e-08	-1	3.19e-06		3512	0.00115673	-1	0.080921
3593	4.64e-08	-1	3.23e-06		8905	0.00117255	-1	0.080921
51676	4.64e-08	-1	3.23e-06		55246	0.00116858	-1	0.080921
399	5.03e-08	-1	3.48e-06		64581	0.00116048	-1	0.080921
29121	5.05e-08	-1	3.48e-06		197259	0.00116916	-1	0.080921
91543	6.02e-08	-1	4.14e-06		963	0.00121372	-1	0.0820011
6503	6.09e-08	-1	4.17e-06		1234	0.00121392	-1	0.0820011
7535	6.31e-08	-1	4.3e-06		4065	0.0011987	-1	0.0820011
951	6.45e-08	-1	4.37e-06		9603	0.00120977	-1	0.0820011
57823	6.54e-08	-1	4.4e-06		83636	0.00121282	-1	0.0820011
64115	6.53e-08	-1	4.4e-06		7128	0.0012462	-1	0.0838265
64761	6.56e-08	-1	4.4e-06		58484	0.00125318	-1	0.0839419
55196	6.64e-08	-1	4.41e-06		52	0.00128535	1	0.0857366
149628	6.62e-08	-1	4.41e-06		22	0.00141191	-1	0.0857587
474344	6.77e-08	-1	4.48e-06		3600	0.00135683	-1	0.0857587
3109	6.92e-08	-1	4.56e-06		4618	0.00140117	1	0.0857587
9881	7.1e-08	-1	4.64e-06		4677	0.00132359	-1	0.0857587
92241	7.08e-08	-1	4.64e-06		5600	0.00135551	1	0.0857587
10390	7.33e-08	-1	4.77e-06		6401	0.00140522	-1	0.0857587
8740	7.59e-08	-1	4.92e-06		7940	0.00134324	-1	0.0857587
8809	7.77e-08	-1	5.02e-06		7941	0.0013772	-1	0.0857587
3458	8.05e-08	-1	5.18e-06		8869	0.00139588	-1	0.0857587
1230	8.29e-08	-1	5.24e-06		9289	0.00135496	1	0.0857587
10287	8.21e-08	-1	5.24e-06		10892	0.00139044	-1	0.0857587
10561	8.28e-08	-1	5.24e-06		26038	0.00141018	1	0.0857587
23543	8.27e-08	1	5.24e-06		50852	0.00132388	-1	0.0857587
3717	8.48e-08	-1	5.35e-06		51056	0.00133522	-1	0.0857587
120425	8.83e-08	-1	5.52e-06		54760	0.00141412	1	0.0857587
155038	8.83e-08	-1	5.52e-06		55745	0.00135757	-1	0.0857587
257144	9.12e-08	-1	5.68e-06		55794	0.00138195	-1	0.0857587
8631	9.27e-08	-1	5.75e-06		64333	0.00131537	-1	0.0857587
7098	9.32e-08	-1	5.76e-06		92106	0.00133662	-1	0.0857587
158830	9.74e-08	-1	5.99e-06		94101	0.00135878	-1	0.0857587
5294	9.82e-08	-1	6.02e-06		113178	0.00141479	1	0.0857587
10148	9.9e-08	-1	6.05e-06		130026	0.00134784	1	0.0857587
3087	1.03e-07	-1	6.25e-06		162387	0.00135319	1	0.0857587
79626	1.03e-07	-1	6.25e-06		167153	0.0014078	-1	0.0857587
2672	1.06e-07	-1	6.39e-06		91851	0.00142329	-1	0.0859474
7128	1.06e-07	-1	6.39e-06		285195	0.00143462	-1	0.0863049
81553	1.07e-07	-1	6.44e-06		4050	0.00146098	-1	0.08756
2634	1.09e-07	-1	6.51e-06		29851	0.00146891	-1	0.0877054
7185	1.09e-07	-1	6.51e-06		5552	0.00148139	-1	0.0877929
64926	1.19e-07	-1	7.04e-06		5595	0.00147974	1	0.0877929
2219	1.22e-07	-1	7.18e-06		3005	0.00150669	1	0.0886333
9051	1.23e-07	-1	7.23e-06		128346	0.00150606	-1	0.0886333
115004	1.23e-07	-1	7.23e-06		4185	0.00153185	1	0.0897821
10507	1.25e-07	-1	7.29e-06		3002	0.00154336	-1	0.0898988
54809	1.25e-07	-1	7.29e-06		92344	0.00154512	-1	0.0898988
10225	1.26e-07	-1	7.32e-06		8148	0.00155154	1	0.089944
54900	1.31e-07	-1	7.56e-06		6776	0.00156487	-1	0.0902755
152926	1.32e-07	-1	7.58e-06		51444	0.00156858	-1	0.0902755
64231	1.44e-07	-1	8.25e-06		5613	0.00158805	-1	0.0907408
170482	1.44e-07	-1	8.25e-06		25797	0.00158523	-1	0.0907408
3665	1.48e-07	-1	8.45e-06		2194	0.00161719	1	0.0909963
89790	1.5e-07	-1	8.49e-06		3737	0.00165531	1	0.0909963
3689	1.51e-07	-1	8.5e-06		6670	0.00163929	-1	0.0909963
9235	1.51e-07	-1	8.5e-06		8530	0.00161788	-1	0.0909963
6355	1.54e-07	-1	8.65e-06		9101	0.00165362	-1	0.0909963
22806	1.56e-07	-1	8.71e-06		9397	0.00164021	-1	0.0909963
159013	1.59e-07	-1	8.85e-06		29099	0.00165345	-1	0.0909963
7805	1.61e-07	-1	8.95e-06		51808	0.00163555	-1	0.0909963
3108	1.63e-07	-1	9.04e-06		56938	0.00161726	-1	0.0909963
8764	1.64e-07	-1	9.05e-06		79712	0.00163714	-1	0.0909963
115350	1.66e-07	-1	9.15e-06		203328	0.00162236	-1	0.0909963
92797	1.68e-07	-1	9.22e-06		51177	0.00166174	-1	0.091036
27240	1.72e-07	-1	9.41e-06		5909	0.00166978	1	0.0911632
50618	1.77e-07	-1	9.62e-06		112616	0.00168294	-1	0.0915679
51762	1.79e-07	-1	9.73e-06		30011	0.00170642	-1	0.092216
3433	1.89e-07	-1	1.02e-05		200916	0.00170164	-1	0.092216
8542	2.02e-07	-1	1.09e-05		4759	0.00171362	1	0.0922925
1193	2.1e-07	-1	1.13e-05		2395	0.00173875	-1	0.0930534
257106	2.1e-07	-1	1.13e-05		6134	0.00173943	-1	0.0930534
11119	2.15e-07	-1	1.15e-05		10146	0.00174872	-1	0.0932376
23228	2.16e-07	-1	1.15e-05		54894	0.00176057	1	0.0935568
10019	2.26e-07	-1	1.2e-05		2961	0.00178394	-1	0.0939681
266747	2.37e-07	-1	1.25e-05		5063	0.001786	-1	0.0939681
55024	2.45e-07	-1	1.29e-05		8832	0.00177841	-1	0.0939681
5920	2.51e-07	-1	1.32e-05		9235	0.00180695	-1	0.0941751
9636	2.54e-07	-1	1.33e-05		150946	0.00179622	1	0.0941751
5243	2.64e-07	-1	1.38e-05		400451	0.00180765	1	0.0941751
3434	2.7e-07	-1	1.39e-05		25801	0.00181837	-1	0.0944252
4063	2.68e-07	-1	1.39e-05		5444	0.00183902	1	0.0948789
7903	2.69e-07	-1	1.39e-05		9039	0.00183523	-1	0.0948789
200315	2.81e-07	-1	1.45e-05		168451	0.00184896	-1	0.0950844
10133	2.83e-07	-1	1.45e-05		10612	0.0018577	1	0.0952266
9535	2.91e-07	-1	1.48e-05		4794	0.00186814	-1	0.0954549
4938	2.99e-07	-1	1.52e-05		3702	0.00187824	-1	0.0956641
128346	2.98e-07	-1	1.52e-05		55008	0.00190075	-1	0.0965026
3280	3e-07	1	1.52e-05		914	0.0019136	-1	0.0967614
933	3.12e-07	-1	1.57e-05		134147	0.00191799	1	0.0967614
10125	3.13e-07	-1	1.57e-05		1521	0.00192435	-1	0.096776
7318	3.21e-07	-1	1.61e-05		57799	0.00193391	1	0.0969508
1880	3.29e-07	-1	1.64e-05		10016	0.00197218	1	0.0985596
6672	3.4e-07	-1	1.69e-05		10569	0.00198986	-1	0.0991323
3579	3.66e-07	-1	1.82e-05		23373	0.00200765	1	0.0997068
9744	3.74e-07	-1	1.85e-05		27430	0.00201719	-1	0.0998698
3115	3.95e-07	-1	1.94e-05		912	0.0020558	-1	0.100145
84433	3.95e-07	-1	1.94e-05		3669	0.00204795	-1	0.100145
4069	4e-07	-1	1.96e-05		5634	0.00209701	-1	0.100145
3383	4.3e-07	-1	2.1e-05		9263	0.00206598	-1	0.100145
272	4.54e-07	-1	2.21e-05		10299	0.00209592	1	0.100145
85441	4.59e-07	-1	2.23e-05		25798	0.00209182	-1	0.100145
10863	4.68e-07	-1	2.27e-05		54808	0.00209814	-1	0.100145
55824	4.72e-07	-1	2.28e-05		57162	0.00203979	-1	0.100145
202309	4.84e-07	-1	2.33e-05		81704	0.00207008	-1	0.100145
8320	4.94e-07	-1	2.37e-05		84967	0.00204039	-1	0.100145
169355	5.06e-07	-1	2.42e-05		155368	0.00209698	1	0.100145
285555	5.27e-07	1	2.52e-05		219743	0.00205843	1	0.100145
7940	5.32e-07	-1	2.53e-05		4068	0.00210765	-1	0.100164
640	5.43e-07	-1	2.58e-05		79148	0.0021111	1	0.100164
1380	5.48e-07	-1	2.59e-05		4600	0.00214986	-1	0.10116
79722	5.55e-07	-1	2.62e-05		4780	0.00215112	-1	0.10116
11040	5.67e-07	-1	2.67e-05		6256	0.00213958	1	0.10116
2313	5.86e-07	-1	2.75e-05		8729	0.00216154	1	0.101351
57559	5.88e-07	-1	2.75e-05		1559	0.00217398	1	0.101635
5475	5.93e-07	1	2.76e-05		203413	0.00218563	-1	0.101881
5610	5.93e-07	-1	2.76e-05		114801	0.00220636	-1	0.102548
4978	5.99e-07	1	2.77e-05		1540	0.00221604	-1	0.102632
6737	6.02e-07	-1	2.78e-05		59286	0.00222748	-1	0.102632
8862	6.07e-07	1	2.8e-05		399818	0.002225	-1	0.102632
9750	6.17e-07	-1	2.84e-05		284451	0.00223398	1	0.102634
9473	6.21e-07	-1	2.84e-05		9839	0.00225744	-1	0.103118
3606	6.25e-07	-1	2.85e-05		64761	0.00225546	-1	0.103118
6347	6.23e-07	-1	2.85e-05		22874	0.00228047	1	0.103282
84824	6.37e-07	-1	2.89e-05		114822	0.00227728	1	0.103282
9047	6.4e-07	-1	2.9e-05		145270	0.00227663	1	0.103282
199	6.44e-07	-1	2.91e-05		168544	0.00229184	1	0.103503
5720	6.55e-07	-1	2.95e-05		4200	0.00230044	-1	0.103565
10068	6.65e-07	-1	2.99e-05		10086	0.00230621	1	0.103565
115761	6.67e-07	-1	2.99e-05		719	0.00237054	-1	0.10413
3936	6.94e-07	-1	3.1e-05		1520	0.0023781	-1	0.10413
131450	6.99e-07	-1	3.11e-05		3937	0.00236751	-1	0.10413
3113	7.14e-07	-1	3.17e-05		4277	0.002345	-1	0.10413
165631	7.22e-07	-1	3.2e-05		5325	0.00236778	-1	0.10413
128611	7.31e-07	-1	3.23e-05		5996	0.0023805	-1	0.10413
11274	7.65e-07	-1	3.37e-05		9404	0.00238411	-1	0.10413
91351	7.7e-07	-1	3.38e-05		9537	0.00234513	1	0.10413
26228	7.87e-07	-1	3.45e-05		112970	0.00232588	-1	0.10413
4542	8.59e-07	-1	3.75e-05		153129	0.00236824	-1	0.10413
114879	8.61e-07	1	3.75e-05		26953	0.00239213	-1	0.104195
1540	8.69e-07	-1	3.78e-05		24140	0.00241398	-1	0.10486
133418	8.9e-07	-1	3.85e-05		221	0.00243986	1	0.10541
80830	8.95e-07	-1	3.87e-05		4698	0.00243615	-1	0.10541
713	9.22e-07	-1	3.97e-05		1889	0.00245161	1	0.105631
2207	9.8e-07	-1	4.21e-05		9583	0.00247934	-1	0.106538
3574	1.01e-06	-1	4.33e-05		597	0.00251638	-1	0.10774
958	1.01e-06	-1	4.33e-05		9772	0.00252083	1	0.10774
397	1.04e-06	-1	4.44e-05		84870	0.00254314	-1	0.108403
941	1.08e-06	-1	4.59e-05		1390	0.00257035	-1	0.109271
10462	1.08e-06	-1	4.6e-05		942	0.00257851	-1	0.109326
29887	1.1e-06	-1	4.66e-05		387357	0.00259638	-1	0.109792
114836	1.1e-06	-1	4.66e-05		2717	0.00262008	-1	0.11024
3604	1.14e-06	-1	4.78e-05		6347	0.00262773	-1	0.11024
51816	1.15e-06	-1	4.82e-05		55634	0.0026269	-1	0.11024
712	1.18e-06	-1	4.95e-05		116984	0.00265069	-1	0.110912
81788	1.23e-06	-1	5.13e-05		29071	0.00266708	-1	0.110965
219699	1.25e-06	1	5.18e-05		91543	0.00267285	-1	0.110965
81848	1.29e-06	1	5.35e-05		284131	0.00265942	1	0.110965
924	1.29e-06	-1	5.35e-05		59271	0.00269438	-1	0.111568
718	1.3e-06	-1	5.36e-05		10462	0.0027022	-1	0.111602
56833	1.31e-06	-1	5.38e-05		200734	0.00271522	1	0.11185
3824	1.35e-06	-1	5.56e-05		57703	0.00275859	-1	0.113344
926	1.36e-06	-1	5.57e-05		10964	0.00276839	-1	0.113454
6850	1.39e-06	-1	5.67e-05		26063	0.002781	1	0.113679
2529	1.45e-06	-1	5.9e-05		1951	0.00279422	1	0.113927
286336	1.46e-06	-1	5.94e-05		3993	0.00280897	1	0.114236
84636	1.49e-06	-1	6.04e-05		26228	0.00281665	-1	0.114257
6363	1.68e-06	-1	6.81e-05		54439	0.00285621	-1	0.115568
56937	1.71e-06	1	6.91e-05		10133	0.00287306	-1	0.115955
23586	1.77e-06	-1	7.12e-05		7096	0.00288214	-1	0.116028
29802	1.79e-06	-1	7.17e-05		1522	0.00291023	-1	0.116084
6444	1.81e-06	1	7.25e-05		5698	0.00294179	-1	0.116084
124535	1.84e-06	-1	7.35e-05		6228	0.0029351	-1	0.116084
3561	1.89e-06	-1	7.55e-05		8115	0.0029014	-1	0.116084
64098	1.91e-06	-1	7.58e-05		9993	0.00293518	1	0.116084
255231	1.92e-06	-1	7.6e-05		79607	0.0029231	-1	0.116084
157	1.94e-06	-1	7.68e-05		84289	0.00292313	1	0.116084
30817	1.97e-06	-1	7.77e-05		203427	0.00289428	-1	0.116084
401494	1.97e-06	-1	7.77e-05		3280	0.00295012	1	0.116126
9262	1.99e-06	-1	7.79e-05		55466	0.00302044	1	0.118309
152137	1.99e-06	-1	7.79e-05		137835	0.0030155	-1	0.118309
684	2e-06	-1	7.8e-05		695	0.00303529	-1	0.118538
56990	2.06e-06	-1	8.04e-05		260436	0.00304115	-1	0.118538
26051	2.09e-06	-1	8.12e-05		84991	0.00305056	-1	0.118615
10261	2.18e-06	-1	8.46e-05		5579	0.0030703	-1	0.118803
8530	2.36e-06	-1	9.14e-05		93233	0.00306748	1	0.118803
8514	2.46e-06	-1	9.5e-05		55890	0.00307922	1	0.118859
29800	2.58e-06	1	9.94e-05		5359	0.0030885	-1	0.11893
2999	2.63e-06	-1	0.000100958		4926	0.00309996	1	0.119083
719	2.66e-06	-1	0.000101695		1760	0.00311606	1	0.119128
23424	2.66e-06	-1	0.000101695		57514	0.00310893	-1	0.119128
567	2.76e-06	-1	0.0001054		93	0.00313163	1	0.119151
714	2.8e-06	-1	0.000106391		55145	0.00312922	-1	0.119151
9111	2.82e-06	-1	0.000106911		79842	0.00313933	-1	0.11916
6398	2.86e-06	-1	0.00010816		58504	0.00315313	-1	0.119184
4005	2.94e-06	-1	0.000111109		134510	0.00315492	-1	0.119184
5341	3.01e-06	-1	0.000113388		1349	0.00320832	-1	0.120915
4794	3.05e-06	-1	0.000114808		129531	0.00322113	-1	0.121111
57630	3.14e-06	1	0.000117791		919	0.0032839	-1	0.121466
9760	3.16e-06	-1	0.00011817		5657	0.00326611	1	0.121466
11006	3.28e-06	-1	0.000122423		6845	0.00328028	-1	0.121466
3004	3.31e-06	-1	0.000123163		8634	0.00327445	-1	0.121466
961	3.32e-06	-1	0.00012334		55619	0.00324844	-1	0.121466
5996	3.34e-06	-1	0.000123715		63940	0.00325436	-1	0.121466
63940	3.38e-06	-1	0.000124876		64122	0.00328111	1	0.121466
1759	3.5e-06	1	0.000129036		8638	0.00331436	-1	0.122309
1731	3.66e-06	-1	0.000134599		253782	0.00335499	1	0.123523
283638	3.7e-06	1	0.000135942		637	0.00344674	-1	0.123532
5450	3.72e-06	-1	0.000136169		830	0.0034706	-1	0.123532
54491	3.76e-06	-1	0.000137511		4644	0.00339068	-1	0.123532
3631	3.84e-06	-1	0.000139615		4782	0.00347922	1	0.123532
22900	3.84e-06	-1	0.000139615		5026	0.00347168	-1	0.123532
257101	3.83e-06	-1	0.000139615		5608	0.00337337	-1	0.123532
8832	3.89e-06	-1	0.000141067		6405	0.00344529	1	0.123532
608	4.12e-06	-1	0.000148779		54675	0.0034312	-1	0.123532
9404	4.35e-06	-1	0.000156836		54927	0.00338844	-1	0.123532
55589	4.38e-06	-1	0.000157523		55287	0.00345836	1	0.123532
9840	4.42e-06	-1	0.000158759		57103	0.00340576	-1	0.123532
56829	4.56e-06	-1	0.000163373		64425	0.00345516	-1	0.123532
259307	4.65e-06	-1	0.000166295		79630	0.00347749	-1	0.123532
50619	4.76e-06	-1	0.00016961		119467	0.00340886	1	0.123532
285195	4.94e-06	-1	0.000175893		203228	0.00341778	-1	0.123532
9743	5.06e-06	1	0.000179484		401474	0.0034115	1	0.123532
56670	5.07e-06	-1	0.000179484		5910	0.00350421	-1	0.123581
83416	5.24e-06	-1	0.000185163		9332	0.00349207	-1	0.123581
80896	5.27e-06	-1	0.000185788		9367	0.00351161	-1	0.123581
284021	5.28e-06	-1	0.000185833		26127	0.00350101	-1	0.123581
6614	5.3e-06	-1	0.000185963		84803	0.00352474	-1	0.123769
64005	5.36e-06	-1	0.000187827		7349	0.00355705	1	0.12463
9844	5.66e-06	-1	0.000197971		56253	0.00356509	-1	0.124637
283234	5.8e-06	-1	0.000202317		167227	0.00357447	-1	0.124692
6375	5.87e-06	-1	0.000204034		90701	0.00360114	-1	0.125348
10538	5.89e-06	-1	0.000204034		6915	0.00364986	1	0.12589
23046	5.89e-06	-1	0.000204034		8204	0.0036641	-1	0.12589
6689	5.92e-06	-1	0.000204822		9640	0.00365345	1	0.12589
58484	5.94e-06	-1	0.000204822		10561	0.00363027	-1	0.12589
9437	6.02e-06	-1	0.000207147		10673	0.00364109	-1	0.12589
7305	6.3e-06	-1	0.000216361		201140	0.0036571	1	0.12589
8875	6.38e-06	-1	0.000218696		776	0.00367206	1	0.125893
333929	6.51e-06	-1	0.000222564		100	0.00369688	-1	0.125931
54518	6.54e-06	-1	0.000223215		2582	0.00369515	1	0.125931
29126	6.65e-06	-1	0.000226564		54903	0.00368341	1	0.125931
60468	6.67e-06	-1	0.000226711		940	0.0037559	-1	0.126628
57699	6.76e-06	-1	0.000229428		965	0.00374204	-1	0.126628
11328	6.78e-06	1	0.000229457		1102	0.00373445	-1	0.126628
116984	6.82e-06	-1	0.000230371		9034	0.00376501	-1	0.126628
6695	6.96e-06	1	0.000234533		9390	0.00375589	1	0.126628
5724	7.01e-06	-1	0.000235665		79885	0.00376324	1	0.126628
54504	7.04e-06	-1	0.000236279		421	0.00382563	1	0.127324
81894	7.14e-06	-1	0.000238993		2589	0.00380999	-1	0.127324
10906	7.17e-06	-1	0.000239768		5315	0.00381871	1	0.127324
375387	7.42e-06	-1	0.000247441		6311	0.00382383	1	0.127324
5777	7.49e-06	-1	0.000249229		23268	0.00380505	1	0.127324
80063	7.62e-06	-1	0.000252929		10549	0.00386268	-1	0.128289
5583	7.76e-06	-1	0.000257197		51286	0.00390269	1	0.129093
23643	7.92e-06	-1	0.000262011		54982	0.00390307	1	0.129093
51393	8e-06	-1	0.000263912		143903	0.00391244	-1	0.129135
3570	8.19e-06	-1	0.000269639		10863	0.00393657	-1	0.129663
597	8.28e-06	-1	0.000272155		5142	0.00397629	-1	0.130488
4049	8.49e-06	-1	0.000278526		55201	0.00398618	1	0.130488
2745	8.53e-06	-1	0.000278929		84951	0.00398561	1	0.130488
6776	8.54e-06	-1	0.000278929		27132	0.00401163	1	0.130963
375757	8.76e-06	1	0.000285664		51251	0.00401711	-1	0.130963
2537	9.12e-06	-1	0.000296554		3606	0.00404733	-1	0.131598
633	9.2e-06	1	0.000298751		8036	0.0040531	-1	0.131598
6401	9.23e-06	-1	0.000299208		137492	0.00407052	-1	0.131895
5368	9.27e-06	-1	0.000299921		374403	0.0040818	-1	0.131992
2268	9.46e-06	-1	0.000304669		3134	0.00410297	-1	0.132408
84969	9.46e-06	-1	0.000304669		403313	0.00411697	-1	0.132591
55281	9.52e-06	-1	0.000306113		23521	0.00412743	-1	0.13266
126969	9.7e-06	1	0.000311028		90634	0.00414883	-1	0.13308
103	9.77e-06	-1	0.000312727		2327	0.00417827	-1	0.133232
26112	9.82e-06	-1	0.000313843		3434	0.00422045	-1	0.133232
27033	9.88e-06	-1	0.000314538		5364	0.00420454	1	0.133232
51237	9.88e-06	-1	0.000314538		5925	0.00418426	-1	0.133232
130589	9.95e-06	-1	0.000316045		50640	0.00416826	-1	0.133232
843	1e-05	-1	0.00031705		59284	0.00421964	1	0.133232
326624	1e-05	-1	0.00031705		64421	0.00419139	-1	0.133232
51296	1.01e-05	-1	0.000318146		94240	0.00421993	-1	0.133232
27430	1.02e-05	-1	0.000321322		5426	0.00424229	1	0.133657
5791	1.02e-05	-1	0.000321659		23457	0.00429698	1	0.134583
10536	1.06e-05	1	0.000334138		115201	0.00428997	-1	0.134583
355	1.07e-05	-1	0.000335421		135935	0.00429058	1	0.134583
118932	1.07e-05	-1	0.000335421		1678	0.00430973	-1	0.134717
23048	1.08e-05	-1	0.000336836		79152	0.00434213	1	0.135232
911	1.1e-05	-1	0.000341608		84787	0.00434317	1	0.135232
10943	1.1e-05	-1	0.000341608		79365	0.00436312	-1	0.135325
158787	1.12e-05	1	0.000346045		340152	0.00436135	-1	0.135325
89857	1.13e-05	-1	0.000351108		8858	0.00437907	1	0.135556
3055	1.21e-05	-1	0.000374438		9260	0.00440955	1	0.135971
84929	1.24e-05	1	0.000381659		9855	0.00440384	1	0.135971
3559	1.25e-05	-1	0.000385476		4482	0.00443162	-1	0.136067
8850	1.26e-05	-1	0.000385979		5098	0.00445992	1	0.136067
1992	1.36e-05	-1	0.000417025		6363	0.00448576	-1	0.136067
100141515	1.36e-05	-1	0.000417025		8320	0.00451018	-1	0.136067
57169	1.38e-05	-1	0.000420853		9308	0.00452317	-1	0.136067
9056	1.43e-05	-1	0.000435903		9589	0.00452363	-1	0.136067
57580	1.43e-05	-1	0.000435903		23312	0.00451408	-1	0.136067
10219	1.46e-05	-1	0.000443811		25949	0.00447885	-1	0.136067
29911	1.47e-05	1	0.000444668		26030	0.00442565	1	0.136067
2359	1.53e-05	-1	0.000461734		27146	0.00451799	1	0.136067
5305	1.57e-05	-1	0.000475458		51182	0.00448813	-1	0.136067
388336	1.59e-05	1	0.000479665		57121	0.00445109	-1	0.136067
5915	1.61e-05	-1	0.000481891		149473	0.00450055	1	0.136067
170954	1.6e-05	-1	0.000481891		2563	0.00456375	1	0.136246
7412	1.62e-05	-1	0.000485488		5076	0.00455263	1	0.136246
9046	1.62e-05	-1	0.000485488		80724	0.00456283	1	0.136246
1493	1.63e-05	-1	0.000485553		84626	0.00454738	1	0.136246
28959	1.63e-05	-1	0.00048671		5294	0.00458682	-1	0.136424
6529	1.69e-05	1	0.000501932		153830	0.0045844	-1	0.136424
91050	1.71e-05	1	0.000507224		79990	0.00461293	1	0.136945
64744	1.76e-05	-1	0.000522447		1514	0.00463266	-1	0.137275
1512	1.83e-05	-1	0.000540558		10466	0.00464994	-1	0.137276
64859	1.84e-05	-1	0.000544139		64115	0.00464165	-1	0.137276
79792	1.89e-05	-1	0.000555493		5778	0.00467451	-1	0.137378
1436	1.91e-05	-1	0.000561309		83986	0.00466528	1	0.137378
4791	1.92e-05	-1	0.000561828		115426	0.00467923	-1	0.137378
91937	1.92e-05	-1	0.000561828		6717	0.00474418	-1	0.138774
4118	1.99e-05	-1	0.000580962		51191	0.00474252	-1	0.138774
114548	1.99e-05	-1	0.000581842		63827	0.004768	1	0.139215
4121	2e-05	-1	0.000583342		661	0.00487166	-1	0.139319
1379	2.02e-05	-1	0.000585809		4863	0.00486638	-1	0.139319
5770	2.02e-05	-1	0.000585809		8809	0.00480458	-1	0.139319
7097	2.02e-05	-1	0.000585809		8932	0.00490224	-1	0.139319
7187	2.1e-05	-1	0.00060724		9344	0.00481662	1	0.139319
5918	2.12e-05	-1	0.000612211		10049	0.00483573	-1	0.139319
1390	2.14e-05	-1	0.00061574		10848	0.00490265	1	0.139319
10126	2.14e-05	1	0.000616453		26504	0.00483368	1	0.139319
64285	2.15e-05	1	0.000618478		51124	0.0048223	-1	0.139319
6404	2.17e-05	-1	0.000622416		57524	0.00480108	1	0.139319
79668	2.18e-05	-1	0.000624902		79003	0.00486586	-1	0.139319
170690	2.24e-05	1	0.00063856		83696	0.00484176	1	0.139319
50650	2.24e-05	-1	0.000638786		83882	0.00489888	1	0.139319
55233	2.26e-05	-1	0.000644701		114971	0.00485779	-1	0.139319
113730	2.31e-05	-1	0.000657783		139231	0.00488302	-1	0.139319
55640	2.32e-05	-1	0.000657828		54148	0.00497109	-1	0.140667
57097	2.38e-05	-1	0.000673801		57002	0.00497655	-1	0.140667
159195	2.39e-05	1	0.000675222		403341	0.00497402	-1	0.140667
359845	2.46e-05	1	0.000694337		340554	0.00500742	-1	0.141289
9332	2.48e-05	-1	0.000697563		718	0.00505013	-1	0.142242
2767	2.49e-05	1	0.000700788		3263	0.00507749	1	0.142761
55544	2.51e-05	-1	0.000704518		9636	0.00510812	-1	0.142997
4647	2.53e-05	-1	0.000709135		29954	0.00510936	1	0.142997
53831	2.57e-05	-1	0.000719987		53829	0.00511279	-1	0.142997
2793	2.61e-05	-1	0.000727279		57504	0.00512368	1	0.14305
8718	2.61e-05	-1	0.000727279		6404	0.00514439	-1	0.143377
7096	2.63e-05	-1	0.000731493		7779	0.00517221	-1	0.143651
9934	2.64e-05	-1	0.000731493		404093	0.00516649	1	0.143651
389206	2.64e-05	-1	0.000731493		4033	0.00519795	-1	0.144114
112399	2.7e-05	1	0.000748467		10240	0.00524661	-1	0.144209
50509	2.74e-05	1	0.000757366		51389	0.00524034	-1	0.144209
1535	2.79e-05	-1	0.000768385		55119	0.00523507	-1	0.144209
9402	2.85e-05	-1	0.000785978		55589	0.00522685	-1	0.144209
10848	2.89e-05	1	0.000793763		64747	0.00524238	-1	0.144209
148932	3e-05	-1	0.000823788		26245	0.00527396	1	0.144704
339541	3.03e-05	-1	0.000830823		79875	0.00530091	1	0.144704
9686	3.06e-05	1	0.000837168		83855	0.00530087	1	0.144704
405754	3.1e-05	1	0.000847107		116729	0.00529119	1	0.144704
55243	3.17e-05	1	0.000864181		3604	0.00532315	-1	0.145063
8837	3.23e-05	-1	0.000877612		1438	0.00534352	-1	0.145121
80231	3.23e-05	-1	0.000877612		79637	0.00533968	1	0.145121
727936	3.39e-05	1	0.00091787		4776	0.00541053	1	0.146488
241	3.4e-05	-1	0.0009205		6133	0.00541356	-1	0.146488
51311	3.42e-05	-1	0.000923207		375743	0.0054214	-1	0.146488
8698	3.44e-05	-1	0.000926829		355	0.00545112	-1	0.146489
64780	3.46e-05	-1	0.000932032		9750	0.00544161	-1	0.146489
10077	3.49e-05	-1	0.000937535		27131	0.00545819	-1	0.146489
6793	3.56e-05	-1	0.0009566		79621	0.00543693	-1	0.146489
10461	3.64e-05	-1	0.000974613		873	0.00550714	-1	0.147449
160364	3.82e-05	-1	0.00102245		3824	0.00551246	-1	0.147449
6693	3.93e-05	-1	0.00105077		8456	0.00557491	1	0.147879
929	4.01e-05	-1	0.00106546		10062	0.00554345	-1	0.147879
51199	4.01e-05	-1	0.00106546		10199	0.00555479	-1	0.147879
55211	4.01e-05	-1	0.00106546		51588	0.0055711	1	0.147879
64747	4.06e-05	-1	0.0010758		84868	0.0055743	-1	0.147879
1522	4.25e-05	-1	0.0011245		3623	0.00564243	1	0.147947
1012	4.3e-05	1	0.00113737		3920	0.00560675	-1	0.147947
11238	4.45e-05	1	0.00117496		4074	0.00559685	-1	0.147947
5873	4.46e-05	-1	0.00117598		5520	0.00563174	-1	0.147947
6036	4.53e-05	-1	0.00119263		9376	0.00563935	1	0.147947
9363	4.54e-05	-1	0.00119323		10926	0.00562149	-1	0.147947
837	4.63e-05	-1	0.00121472		339263	0.00560821	1	0.147947
5549	4.78e-05	1	0.00125074		291	0.0056854	1	0.148004
7099	4.8e-05	-1	0.00125329		6252	0.00568877	-1	0.148004
3512	4.86e-05	-1	0.00126721		10801	0.00569104	1	0.148004
10260	4.95e-05	-1	0.00128874		23613	0.00568328	1	0.148004
4325	4.97e-05	1	0.00129202		221178	0.00569065	-1	0.148004
55080	5.02e-05	-1	0.00130214		27107	0.00570133	-1	0.14803
1997	5.16e-05	-1	0.00133648		1735	0.0057107	1	0.148033
10736	5.23e-05	1	0.0013526		8915	0.00572271	-1	0.148103
90634	5.23e-05	-1	0.0013526		10621	0.0057632	-1	0.148909
79630	5.37e-05	-1	0.00138584		5873	0.00581938	-1	0.149633
80263	5.41e-05	1	0.00139214		6531	0.00581909	1	0.149633
7052	5.51e-05	-1	0.00141689		79987	0.00580491	1	0.149633
334	5.56e-05	1	0.00142844		122525	0.00582908	-1	0.149641
9873	5.83e-05	-1	0.00149534		50999	0.00585815	-1	0.150146
2922	5.87e-05	1	0.00150087		8659	0.00588212	1	0.150518
160492	5.88e-05	1	0.00150136		256643	0.00594155	-1	0.151795
27090	5.98e-05	-1	0.0015243		11143	0.00597251	1	0.152175
64421	6.1e-05	-1	0.00155293		400629	0.0059755	1	0.152175
393	6.14e-05	-1	0.0015598		4354	0.00603272	-1	0.153387
151295	6.14e-05	1	0.0015598		161829	0.00604562	1	0.15347
1633	6.21e-05	-1	0.0015733		3075	0.00610327	-1	0.153484
23157	6.22e-05	-1	0.00157496		5524	0.00610386	1	0.153484
84870	6.25e-05	-1	0.00158029		25927	0.00610393	-1	0.153484
2201	6.32e-05	1	0.00159355		55239	0.00608593	-1	0.153484
85461	6.52e-05	1	0.00164324		64407	0.00606688	-1	0.153484
2185	6.56e-05	-1	0.00164584		285498	0.00609338	1	0.153484
8605	6.55e-05	-1	0.00164584		113174	0.00612076	-1	0.153665
58476	6.62e-05	1	0.00165717		9572	0.00615379	1	0.15379
79953	6.61e-05	1	0.00165717		10048	0.0061436	1	0.15379
83933	6.79e-05	1	0.00169604		64224	0.00615525	-1	0.15379
125476	6.99e-05	1	0.0017434		91869	0.006174	1	0.15379
351	7.02e-05	1	0.00174693		115703	0.00616796	1	0.15379
5834	7.02e-05	1	0.00174693		1915	0.00621458	-1	0.154079
84868	7.26e-05	-1	0.00180246		57545	0.00621319	1	0.154079
11314	7.3e-05	-1	0.00180907		84824	0.00621396	-1	0.154079
85363	7.37e-05	-1	0.0018194		388743	0.00622538	1	0.154107
203228	7.37e-05	-1	0.0018194		2342	0.00637497	1	0.154218
284759	7.36e-05	-1	0.0018194		2908	0.0063722	-1	0.154218
57713	7.39e-05	-1	0.00182026		3001	0.00634797	-1	0.154218
285093	7.54e-05	1	0.00185493		3911	0.00625008	1	0.154218
79370	7.78e-05	1	0.00191025		3936	0.00630952	-1	0.154218
9028	7.86e-05	1	0.00192709		6355	0.00632819	-1	0.154218
146722	7.87e-05	-1	0.00192709		6560	0.00629973	1	0.154218
5993	7.88e-05	-1	0.00192747		6781	0.00636365	1	0.154218
5033	7.93e-05	1	0.00193697		8526	0.00627043	1	0.154218
6892	7.98e-05	-1	0.00194377		23515	0.00626894	-1	0.154218
9263	8e-05	-1	0.00194377		26505	0.00626049	1	0.154218
120534	7.99e-05	-1	0.00194377		57414	0.00637112	1	0.154218
23345	8.15e-05	-1	0.00197684		60685	0.00632448	1	0.154218
3563	8.19e-05	-1	0.00198102		83440	0.00635649	-1	0.154218
25801	8.18e-05	-1	0.00198102		159091	0.00629726	1	0.154218
54103	8.23e-05	-1	0.0019845		5368	0.00644021	-1	0.15509
79180	8.22e-05	-1	0.0019845		6804	0.00642882	1	0.15509
348	8.27e-05	-1	0.00199163		54551	0.00643677	1	0.15509
9450	8.35e-05	-1	0.00200751		3706	0.00649807	1	0.156012
127700	8.41e-05	1	0.00201899		84033	0.00649544	1	0.156012
285513	8.71e-05	-1	0.00208839		6926	0.00656614	1	0.156235
7089	8.78e-05	1	0.00210115		83641	0.0065465	-1	0.156235
1326	8.81e-05	-1	0.00210418		84159	0.00656452	1	0.156235
57167	8.82e-05	1	0.00210418		93107	0.00656165	1	0.156235
4038	8.87e-05	1	0.00211274		219699	0.00652132	1	0.156235
8648	8.98e-05	-1	0.00213557		348094	0.0065643	-1	0.156235
60312	9.06e-05	1	0.00215213		55080	0.00658632	-1	0.156482
155054	9.17e-05	1	0.00217528		1479	0.00666456	-1	0.157098
196383	9.19e-05	-1	0.00217782		7386	0.00668424	-1	0.157098
972	9.29e-05	-1	0.00219443		7852	0.00666135	-1	0.157098
9828	9.29e-05	1	0.00219443		8424	0.00668823	-1	0.157098
3429	9.42e-05	-1	0.00222206		10775	0.00667	-1	0.157098
64174	9.55e-05	-1	0.00224861		55048	0.006662	1	0.157098
79415	9.83e-05	-1	0.00231212		56751	0.00668657	1	0.157098
79858	0.0001	1	0.00234686		83660	0.00669111	1	0.157098
27071	0.000100268	-1	0.0023507		284186	0.00671135	1	0.157342
220213	0.000102419	-1	0.00239761		974	0.00676489	-1	0.15785
220972	0.00010284	-1	0.00240392		3620	0.00676169	-1	0.15785
3111	0.000105559	-1	0.00246387		10038	0.00674538	1	0.15785
656	0.000109238	1	0.00254601		54487	0.00677265	1	0.15785
100	0.000110898	-1	0.00258092		10261	0.00680552	-1	0.157937
9695	0.000111301	-1	0.00258654		58512	0.00680715	1	0.157937
64420	0.00011215	-1	0.00260247		90580	0.006816	-1	0.157937
1717	0.00011237	1	0.00260377		116441	0.00679504	-1	0.157937
114780	0.000112726	1	0.00260825		117	0.00686527	1	0.158005
7293	0.00011324	-1	0.00261633		7781	0.00685015	1	0.158005
896	0.000113823	-1	0.002626		64429	0.00684136	-1	0.158005
387718	0.000114409	1	0.00263571		83697	0.00686848	1	0.158005
115207	0.000115862	-1	0.00266532		143678	0.00685217	1	0.158005
6546	0.000116701	-1	0.00268076		5566	0.00688132	1	0.158072
4066	0.000119903	-1	0.00274683		1536	0.00693675	-1	0.158804
51167	0.000119922	-1	0.00274683		7978	0.00697036	-1	0.158804
1776	0.000121027	-1	0.00276421		9258	0.00692953	-1	0.158804
3959	0.000121026	-1	0.00276421		94032	0.00696554	1	0.158804
1606	0.000121321	-1	0.00276696		128338	0.00697181	-1	0.158804
10082	0.000122589	1	0.00279189		169270	0.00697294	-1	0.158804
65985	0.000123229	1	0.00280244		6737	0.00700902	-1	0.159398
83440	0.000123655	-1	0.00280812		80896	0.00704345	-1	0.159953
92106	0.000125652	-1	0.00284943		3854	0.00705429	-1	0.159971
9266	0.00012722	1	0.00288089		23511	0.0070939	1	0.160641
22861	0.000128576	-1	0.00290745		26524	0.00712651	1	0.160922
9052	0.000128799	1	0.00290837		79157	0.00712261	1	0.160922
63898	0.000130832	1	0.0029501		930	0.0071425	-1	0.161055
6567	0.000134395	1	0.00302616		4323	0.00719858	1	0.161919
4065	0.00013591	-1	0.00305597		55320	0.00721128	-1	0.161919
7941	0.000137294	-1	0.00308272		64072	0.0072067	1	0.161919
10791	0.000138812	-1	0.00311244		3109	0.00723954	-1	0.162174
2811	0.000139246	-1	0.00311777		55266	0.00727093	1	0.162174
5551	0.000139512	-1	0.00311935		57497	0.00731223	1	0.162174
4354	0.000140113	-1	0.00312839		79739	0.00726821	1	0.162174
64581	0.000140812	-1	0.00313961		80311	0.00729973	-1	0.162174
26578	0.000141634	-1	0.00314913		84128	0.00730194	-1	0.162174
64283	0.000141576	1	0.00314913		129684	0.00725913	1	0.162174
2026	0.000142668	1	0.00316393		158067	0.00731419	1	0.162174
9452	0.000142697	-1	0.00316393		285237	0.00729916	-1	0.162174
122616	0.000143955	1	0.00318739		28964	0.00735564	1	0.162866
57732	0.000144526	-1	0.0031956		54510	0.0073664	-1	0.162878
6320	0.000145505	1	0.00321279		2176	0.00744087	1	0.163167
8934	0.000147263	-1	0.00324713		3437	0.00740862	-1	0.163167
27	0.000147692	1	0.00325209		7678	0.00742228	-1	0.163167
493861	0.000148265	-1	0.0032602		55095	0.00739289	1	0.163167
10475	0.000149424	-1	0.00328116		137970	0.00743552	1	0.163167
9727	0.000151857	1	0.00333		221302	0.0074339	-1	0.163167
57621	0.000152693	-1	0.00334374		54793	0.00745554	-1	0.163264
200407	0.000153232	1	0.00335093		2857	0.00751156	-1	0.16391
51667	0.000154866	-1	0.00338202		10161	0.00753498	-1	0.16391
268	0.000155227	1	0.00338527		10196	0.00752849	-1	0.16391
2222	0.000159489	1	0.00347347		51314	0.00753647	-1	0.16391
81552	0.000160476	-1	0.00349018		53831	0.00750693	-1	0.16391
9014	0.000161795	-1	0.00351364		65080	0.00757263	-1	0.164343
64127	0.000161995	-1	0.00351364		353497	0.00757698	1	0.164343
8013	0.000162245	-1	0.00351427		10509	0.0076304	1	0.164958
6001	0.000162556	-1	0.00351625		11280	0.00763636	1	0.164958
255027	0.000163809	1	0.00353855		221785	0.00763113	-1	0.164958
23600	0.000165023	1	0.00355993		6742	0.00765507	-1	0.165138
51735	0.000165766	-1	0.00357113		4542	0.00777428	-1	0.166226
8743	0.000168532	-1	0.00362582		4584	0.00771874	1	0.166226
6366	0.000169844	-1	0.00364914		5547	0.0077889	-1	0.166226
4792	0.000171048	-1	0.00367005		22878	0.00773149	-1	0.166226
27345	0.000173171	1	0.00371061		51650	0.00777241	-1	0.166226
90861	0.000173929	1	0.00372184		65991	0.0077384	-1	0.166226
2534	0.00017822	-1	0.00380855		151888	0.0077833	-1	0.166226
1300	0.000179069	1	0.00381732		157697	0.00777488	1	0.166226
339834	0.000179109	1	0.00381732		92610	0.00780688	-1	0.166387
339221	0.000179598	1	0.00382264		4155	0.00781851	-1	0.166412
55707	0.000180184	-1	0.00382999		1730	0.0078679	-1	0.166433
116449	0.000180856	-1	0.00383915		5339	0.00788214	1	0.166433
3687	0.000181682	-1	0.00385157		29107	0.00785003	-1	0.166433
148418	0.000185715	1	0.00393184		80011	0.00785938	-1	0.166433
863	0.000187131	-1	0.00395655		115273	0.00784521	-1	0.166433
115557	0.000188651	1	0.0039834		155038	0.00787172	-1	0.166433
60559	0.0001956	-1	0.00412467		3037	0.0079278	-1	0.166913
80216	0.000199016	-1	0.00418889		10950	0.00791761	-1	0.166913
84230	0.000199171	-1	0.00418889		79143	0.00794546	1	0.166913
59307	0.000200199	-1	0.00420496		100130933	0.00794676	1	0.166913
55911	0.000204009	-1	0.00427936		23279	0.00796431	-1	0.167062
8218	0.000204941	1	0.00429325		23144	0.00799392	1	0.167463
90993	0.000205372	1	0.00429664		3676	0.00805184	-1	0.167737
80183	0.000207483	-1	0.00433512		4059	0.00804612	1	0.167737
11085	0.000209408	1	0.00436961		23060	0.00803117	1	0.167737
9683	0.00021062	-1	0.00438915		28985	0.0080596	-1	0.167737
57624	0.000214997	1	0.00447452		54900	0.00803295	-1	0.167737
23231	0.000216767	-1	0.00450547		4598	0.00816422	1	0.169251
6272	0.000218429	1	0.00453411		7407	0.00814302	1	0.169251
945	0.000222189	-1	0.00460615		7551	0.00815399	-1	0.169251
23495	0.000223725	-1	0.00463198		7305	0.00821984	-1	0.169613
85007	0.000227408	-1	0.00470213		51422	0.00822424	-1	0.169613
389	0.00022816	1	0.00470803		115207	0.00820494	-1	0.169613
92610	0.000228284	-1	0.00470803		441168	0.00821504	-1	0.169613
81537	0.000229093	-1	0.0047186		55617	0.008248	-1	0.169883
1378	0.000230268	-1	0.00473669		22844	0.0082627	1	0.169966
84939	0.000233935	1	0.00480592		2307	0.00833933	1	0.170795
120114	0.000234499	1	0.0048113		10285	0.00835322	-1	0.170795
94039	0.000236906	-1	0.00485445		25780	0.00832781	-1	0.170795
56925	0.000240974	-1	0.00493146		202309	0.00835655	-1	0.170795
51348	0.00024315	-1	0.00495367		728927	0.00833438	-1	0.170795
57590	0.00024322	-1	0.00495367		488	0.00854468	1	0.171176
81558	0.000242583	-1	0.00495367		1955	0.00849596	1	0.171176
91523	0.000243302	-1	0.00495367		2264	0.00853735	1	0.171176
181	0.000244769	1	0.00497717		8479	0.00842498	1	0.171176
3553	0.000246591	-1	0.00500783		8911	0.00850539	1	0.171176
92999	0.000248568	1	0.00504156		9788	0.00856769	1	0.171176
79621	0.000250205	-1	0.00506833		10208	0.0085874	-1	0.171176
1297	0.000250892	1	0.00507579		23357	0.0085837	1	0.171176
10062	0.000252399	-1	0.0050998		23474	0.00844547	-1	0.171176
4790	0.000252747	-1	0.00510036		26225	0.00853638	-1	0.171176
1294	0.000253475	1	0.00510859		51735	0.008466	-1	0.171176
245932	0.000254336	1	0.00511949		85417	0.00856092	1	0.171176
153328	0.000256241	1	0.00515132		89790	0.00854206	-1	0.171176
3684	0.000261911	-1	0.00525867		89941	0.00859511	1	0.171176
4323	0.000262779	1	0.00526947		133746	0.00839267	-1	0.171176
10480	0.000264801	-1	0.0053008		151647	0.00845764	1	0.171176
88455	0.000265007	-1	0.0053008		221079	0.00860068	-1	0.171176
8728	0.000265954	-1	0.00531308		255743	0.00842772	1	0.171176
253827	0.000267224	1	0.00533178		283358	0.00845794	1	0.171176
6781	0.000267559	1	0.00533178		643677	0.00851045	1	0.171176
84333	0.000268584	-1	0.00534553		653361	0.00854203	-1	0.171176
197335	0.000268969	1	0.00534651		1437	0.008634	1	0.171625
4753	0.000271191	-1	0.00538396		4761	0.00867343	1	0.171959
54626	0.0002737	1	0.00542702		5139	0.00869341	1	0.171959
4012	0.00027633	-1	0.00547237		5725	0.00869252	1	0.171959
3913	0.000276868	1	0.00547622		10716	0.00870473	1	0.171959
51151	0.000279526	1	0.00552195		60468	0.00870025	-1	0.171959
54757	0.000282404	-1	0.00556923		1109	0.0087752	1	0.172709
93663	0.000282619	-1	0.00556923		3674	0.00876562	1	0.172709
9976	0.000289075	-1	0.00568898		30000	0.00876268	1	0.172709
54855	0.00028941	-1	0.00568898		79626	0.00880899	-1	0.17316
3488	0.000291677	1	0.00572395		8912	0.00886003	1	0.173804
221416	0.000291906	1	0.00572395		22859	0.00886356	1	0.173804
199786	0.000296067	-1	0.00579839		51545	0.00889051	-1	0.174119
6403	0.000296895	-1	0.00580037		84166	0.00891026	-1	0.174291
11064	0.000296732	-1	0.00580037		30850	0.00893036	1	0.17447
7422	0.000303381	1	0.00591984		116064	0.00894913	-1	0.174623
728279	0.00030556	1	0.00595505		64105	0.00896654	-1	0.174749
6494	0.000307285	-1	0.00598137		2791	0.00898865	-1	0.17489
27010	0.000308302	-1	0.00599385		127943	0.0089957	-1	0.17489
4015	0.000310397	1	0.00602722		3659	0.00903963	-1	0.17553
1844	0.000313363	-1	0.00607741		3054	0.00907178	1	0.17555
23064	0.000316037	-1	0.00612182		3108	0.00915384	-1	0.17555
5594	0.000316968	-1	0.00613241		4316	0.00908535	-1	0.17555
85463	0.000319767	-1	0.00617906		5300	0.00917283	-1	0.17555
51310	0.000320338	1	0.0061826		9913	0.00913983	-1	0.17555
2977	0.000320811	1	0.00618424		10847	0.00914712	1	0.17555
54737	0.000326459	-1	0.00628552		23152	0.00910241	1	0.17555
145942	0.000327029	1	0.0062889		23759	0.00914398	1	0.17555
51338	0.000330041	-1	0.00633918		54102	0.00916165	-1	0.17555
649	0.00033479	1	0.00642265		55326	0.00913889	-1	0.17555
780	0.000336243	1	0.00644278		57165	0.00914381	1	0.17555
93166	0.00033703	1	0.0064501		116412	0.00916295	1	0.17555
11182	0.000344166	-1	0.00657878		57685	0.00919696	-1	0.175643
10557	0.000347853	-1	0.00663969		79685	0.00919974	-1	0.175643
57670	0.000348186	1	0.00663969		51058	0.00923382	-1	0.176083
25865	0.000353538	-1	0.0067337		144717	0.00924612	1	0.176107
10945	0.000361567	1	0.0068784		339559	0.00927349	-1	0.176418
10240	0.000364729	-1	0.00693028		3480	0.00932306	1	0.176453
64919	0.000367178	-1	0.00696626		56731	0.0093307	1	0.176453
255220	0.000367496	1	0.00696626		57125	0.00931567	1	0.176453
162394	0.000370701	-1	0.00701867		60493	0.00932209	-1	0.176453
838	0.00037544	-1	0.00709995		79576	0.00928916	-1	0.176453
2153	0.000377257	-1	0.00712587		2914	0.00936439	1	0.176613
160518	0.00038053	-1	0.00717919		9817	0.00937236	-1	0.176613
440193	0.000382056	-1	0.00719946		155435	0.00935254	-1	0.176613
84106	0.000383453	-1	0.00721725		3052	0.00945024	-1	0.177653
197320	0.000385912	1	0.00725496		7090	0.00946102	1	0.177653
84674	0.000387088	-1	0.00726851		93134	0.00945065	-1	0.177653
79919	0.000387874	1	0.0072747		440193	0.00948736	-1	0.177938
5027	0.000390616	-1	0.00731752		49854	0.00953282	-1	0.178371
220929	0.00039296	-1	0.00735279		116159	0.0095223	-1	0.178371
55365	0.000394522	-1	0.00737335		4582	0.00956168	1	0.178701
643866	0.000395696	-1	0.00738664		201456	0.00961226	1	0.179323
203100	0.00039813	-1	0.00742338		203522	0.00961743	-1	0.179323
51362	0.00040363	-1	0.00751713		57701	0.00963184	1	0.179382
6252	0.000405027	-1	0.00753436		8557	0.00973371	1	0.1796
4061	0.000406526	-1	0.00755343		9214	0.00970481	-1	0.1796
579	0.000410024	1	0.00760954		23660	0.00967119	-1	0.1796
7414	0.00041382	1	0.00767106		54328	0.0096612	1	0.1796
4064	0.000417257	-1	0.0077258		54936	0.00972653	-1	0.1796
51135	0.00041854	-1	0.00774056		57700	0.00969235	1	0.1796
64423	0.000421477	1	0.00778585		84328	0.00971128	1	0.1796
23368	0.00042744	1	0.00788685		283987	0.009698	1	0.1796
11098	0.000428983	1	0.00790618		781	0.00977483	1	0.180151
64288	0.000435447	1	0.00801604		81786	0.00980501	1	0.180498
114818	0.000437437	1	0.00804338		6830	0.00982167	1	0.180596
51400	0.000438323	1	0.0080504		25983	0.00985838	-1	0.181063
91179	0.0004398	1	0.00806822		140735	0.00987148	1	0.181095
338339	0.000440833	-1	0.00807789		2219	0.00993827	-1	0.181277
89932	0.000442631	-1	0.00810152		5341	0.00992819	-1	0.181277
92	0.000448372	1	0.00818779		9728	0.00992998	-1	0.181277
168455	0.00044825	-1	0.00818779		29998	0.00990977	1	0.181277
56000	0.000452004	1	0.00824467		83877	0.00991262	-1	0.181277
3903	0.000455154	-1	0.00828319		4286	0.00995334	1	0.181344
10229	0.000454653	1	0.00828319		416	0.00996595	1	0.181367
54941	0.000460749	-1	0.00837494		26149	0.0100258	-1	0.182248
284716	0.000461247	1	0.00837494		79177	0.0100881	-1	0.18316
376497	0.000463943	1	0.0084143		140801	0.010099	-1	0.18316
113402	0.000464679	-1	0.00841808		241	0.0101243	-1	0.183209
4615	0.00046993	-1	0.00850355		388228	0.0101273	1	0.183209
83986	0.000473048	1	0.00855026		389320	0.0101362	-1	0.183209
55509	0.000473878	-1	0.00855556		7570	0.0102314	-1	0.183534
340348	0.000475987	-1	0.00858391		7760	0.010209	1	0.183534
2908	0.000477082	-1	0.00859395		8289	0.0102448	1	0.183534
2068	0.000478228	1	0.00859516		23205	0.0102398	1	0.183534
23358	0.000478019	-1	0.00859516		54961	0.010209	1	0.183534
9050	0.000478898	-1	0.00859752		54979	0.0102251	1	0.183534
1370	0.000483754	1	0.00867493		55848	0.0102452	-1	0.183534
23677	0.000490915	1	0.00876795		81848	0.0102462	1	0.183534
57538	0.000490726	1	0.00876795		158219	0.0103041	-1	0.183951
115948	0.000491142	1	0.00876795		254263	0.0102878	1	0.183951
284297	0.000490035	1	0.00876795		254528	0.0103026	1	0.183951
55905	0.000498231	-1	0.00888456		9051	0.0103838	-1	0.185031
122416	0.000504767	1	0.00899105		23396	0.0103878	1	0.185031
5971	0.000506944	-1	0.00901976		1491	0.0105045	1	0.186069
54464	0.000509246	-1	0.00905062		2517	0.0105208	-1	0.186069
165186	0.000512203	-1	0.00908931		6689	0.0105069	-1	0.186069
222611	0.000512564	1	0.00908931		9236	0.0104832	-1	0.186069
9958	0.000514336	-1	0.0091106		27189	0.010521	1	0.186069
374618	0.00051538	1	0.00911897		112885	0.0105278	1	0.186069
245934	0.000520751	1	0.00920379		140711	0.0104857	1	0.186069
540	0.000521988	1	0.00921542		1380	0.0105907	-1	0.186149
10620	0.000527574	-1	0.00929347		2643	0.0105873	-1	0.186149
23464	0.00052727	1	0.00929347		10781	0.0105518	-1	0.186149
3167	0.000529304	1	0.00931364		83787	0.0105646	-1	0.186149
10309	0.000530127	1	0.00931785		84068	0.0105776	1	0.186149
51365	0.000536495	-1	0.00941939		4597	0.010613	1	0.186336
50836	0.000539219	1	0.0094568		23586	0.01063	-1	0.186429
8497	0.00054164	1	0.0094784		133418	0.0106663	-1	0.186655
619208	0.000541294	1	0.0094784		148156	0.0106638	-1	0.186655
54877	0.000545668	-1	0.00953842		2822	0.0106985	1	0.186694
50999	0.000547886	-1	0.0095667		4599	0.0107154	-1	0.186694
94120	0.00054948	-1	0.00958405		84938	0.0107153	-1	0.186694
29957	0.000552308	1	0.00962284		149461	0.0107099	1	0.186694
173	0.000552964	1	0.00962334		3625	0.010728	1	0.186709
84516	0.000554148	1	0.00962334		683	0.0108464	-1	0.188053
203190	0.000553619	1	0.00962334		2633	0.0108642	-1	0.188053
3400	0.000557332	1	0.00965759		3710	0.0108442	1	0.188053
6385	0.000557064	1	0.00965759		8082	0.0108621	-1	0.188053
92689	0.000558042	1	0.0096594		80148	0.0108296	-1	0.188053
3930	0.000558681	-1	0.00965998		84930	0.0109641	-1	0.189577
9830	0.000562156	-1	0.00970953		4094	0.0110291	1	0.190479
11161	0.000564885	1	0.00973556		9510	0.0110521	-1	0.190479
60676	0.000564502	1	0.00973556		10563	0.0110428	-1	0.190479
4644	0.00056804	-1	0.00977937		2532	0.0110968	-1	0.191042
55573	0.000575155	-1	0.00989118		9933	0.0111539	-1	0.191236
9770	0.000577002	-1	0.00991224		55020	0.0111438	1	0.191236
5371	0.000579103	-1	0.00992695		112817	0.0111392	1	0.191236
9023	0.000578912	-1	0.00992695		140609	0.011156	-1	0.191236
1506	0.000584355	-1	0.0100062		9452	0.011181	-1	0.191253
10085	0.000585393	1	0.0100132		152926	0.011171	-1	0.191253
80164	0.000586922	1	0.0100235		2202	0.0112133	-1	0.191429
117194	0.000587253	1	0.0100235		10735	0.0112492	-1	0.191429
841	0.00058868	1	0.0100371		23145	0.011256	1	0.191429
57585	0.000591287	1	0.0100708		64108	0.0112523	-1	0.191429
56262	0.00059423	1	0.0101102		90007	0.0112347	1	0.191429
84620	0.000597092	1	0.010148		285605	0.0112634	1	0.191429
64170	0.000599396	-1	0.0101763		326624	0.0112864	-1	0.191616
79589	0.000603748	1	0.0102387		3578	0.0113775	1	0.191949
116447	0.000604352	1	0.0102387		4189	0.0113783	-1	0.191949
23247	0.000611155	1	0.010321		7020	0.0113782	1	0.191949
113146	0.000610841	1	0.010321		55300	0.0113294	-1	0.191949
375791	0.000610063	1	0.010321		148823	0.0113761	1	0.191949
2876	0.000615517	-1	0.0103837		160760	0.0113442	-1	0.191949
710	0.0006217	-1	0.0104769		5710	0.0114103	1	0.192287
373156	0.000623291	-1	0.0104926		7204	0.0114865	1	0.193366
409	0.000625244	-1	0.0105019		6720	0.0115257	1	0.193737
23077	0.00062518	-1	0.0105019		79729	0.0115328	1	0.193737
348378	0.00062582	-1	0.0105019		6654	0.0115608	1	0.194002
5906	0.000628283	-1	0.0105322		8804	0.011636	-1	0.194098
51251	0.000629739	-1	0.0105455		9465	0.0116639	-1	0.194098
51465	0.000632961	-1	0.0105883		11021	0.0116213	1	0.194098
57221	0.000635276	1	0.0106159		57649	0.0116439	1	0.194098
56256	0.000640166	1	0.0106753		91614	0.0116635	-1	0.194098
80832	0.000640169	-1	0.0106753		131450	0.0116357	-1	0.194098
260436	0.00064549	-1	0.0107528		132954	0.0116055	1	0.194098
374654	0.000646799	1	0.0107633		255231	0.0116066	-1	0.194098
10308	0.000650713	-1	0.0108172		79047	0.0116902	1	0.194333
1428	0.000652469	1	0.0108249		7140	0.0117557	1	0.195218
153364	0.000652539	-1	0.0108249		51308	0.0117745	1	0.195327
10268	0.000653508	-1	0.0108298		10384	0.0118024	-1	0.195586
283869	0.000654744	1	0.010839		4673	0.0118472	-1	0.195745
83953	0.000657375	-1	0.01086		23585	0.0118248	-1	0.195745
148398	0.000657324	1	0.01086		93210	0.0118488	1	0.195745
259197	0.000663186	-1	0.0109446		3433	0.0119115	-1	0.196576
325	0.000673919	1	0.0111052		25930	0.0119499	1	0.196601
10417	0.00067431	1	0.0111052		29780	0.0119487	-1	0.196601
2532	0.000677067	-1	0.0111391		79760	0.0119385	1	0.196601
29110	0.000678858	-1	0.0111571		31	0.0119643	1	0.196634
59271	0.000680273	-1	0.0111688		3357	0.0120666	-1	0.198111
7041	0.00068726	1	0.0112603		23231	0.0120818	-1	0.198156
285498	0.000686954	1	0.0112603		65056	0.0121053	-1	0.198337
390058	0.000690161	1	0.0112962		8065	0.0121204	-1	0.198366
23347	0.000696125	-1	0.0113757		56344	0.0121319	1	0.198366
54906	0.000696444	-1	0.0113757		121457	0.0121691	-1	0.19877
317701	0.000698901	1	0.0113925		3099	0.0121907	1	0.198846
643236	0.000698554	1	0.0113925		3475	0.0121987	-1	0.198846
1677	0.00070572	-1	0.0114802		1534	0.012398	1	0.199226
29923	0.000705077	1	0.0114802		1657	0.01239	-1	0.199226
26355	0.000709875	1	0.011536		1743	0.0124191	1	0.199226
10217	0.000718025	1	0.0116566		6118	0.0123921	-1	0.199226
92270	0.000722113	1	0.011711		8195	0.0123038	-1	0.199226
57116	0.000724492	-1	0.0117257		10623	0.0123759	-1	0.199226
153562	0.000723947	1	0.0117257		11057	0.0123201	1	0.199226
916	0.000729611	-1	0.0117966		11129	0.0124594	1	0.199226
4062	0.000734538	1	0.0118642		11157	0.0123088	-1	0.199226
6773	0.000736345	-1	0.0118814		23247	0.0124069	1	0.199226
55129	0.000738433	1	0.011903		53373	0.0124379	1	0.199226
258	0.000739791	1	0.0119129		55276	0.0124274	-1	0.199226
959	0.000745442	-1	0.0119918		89932	0.0122731	-1	0.199226
256987	0.000752048	1	0.0120858		146713	0.0124495	1	0.199226
139818	0.000757414	-1	0.0121598		146956	0.0124545	1	0.199226
79931	0.000762395	-1	0.0122275		283849	0.0123381	1	0.199226
85300	0.000767616	1	0.0122988		285672	0.0124447	-1	0.199226
90550	0.000768835	1	0.012306		342918	0.0124405	1	0.199226
3693	0.000772005	1	0.0123443		729956	0.0124008	1	0.199226
55013	0.000773379	-1	0.0123539		25789	0.0124884	1	0.19929
132160	0.00077618	-1	0.0123863		134288	0.0124864	1	0.19929
6484	0.000784505	1	0.0125066		9732	0.012507	-1	0.199387
27148	0.000792193	1	0.0126165		56123	0.0125507	1	0.199884
920	0.000796466	-1	0.0126519		80301	0.0125688	-1	0.199973
145864	0.000795291	-1	0.0126519		80727	0.012616	1	0.200324
146227	0.000796797	1	0.0126519		149830	0.0126056	1	0.200324
611	0.00079771	1	0.0126538		10019	0.0126479	-1	0.200431
10333	0.000802439	-1	0.0127162		142940	0.0126378	-1	0.200431
56729	0.000806251	1	0.0127639		7695	0.0126736	-1	0.200638
122622	0.000810064	1	0.0128115		222256	0.0126918	1	0.200727
8747	0.00081315	1	0.0128476		1412	0.012753	1	0.201006
9376	0.000816563	1	0.0128888		2745	0.0127927	-1	0.201006
8437	0.000817978	1	0.0128983		3684	0.0127246	-1	0.201006
2342	0.00082341	1	0.0129712		6629	0.0127821	-1	0.201006
23312	0.000832168	-1	0.0130962		7775	0.0127953	-1	0.201006
65065	0.000833728	1	0.0131078		29950	0.012795	-1	0.201006
64167	0.000836357	-1	0.0131362		80264	0.0127977	-1	0.201006
4009	0.000843116	1	0.0132293		9056	0.0128493	-1	0.201419
64218	0.000844724	-1	0.0132415		57415	0.0128435	1	0.201419
2113	0.000845631	-1	0.0132427		10071	0.0128685	1	0.201522
716	0.000848711	-1	0.0132663		4087	0.0129261	-1	0.201829
79651	0.000848804	-1	0.0132663		58527	0.012917	-1	0.201829
79085	0.000852401	1	0.0133095		80709	0.012922	-1	0.201829
9580	0.00085347	1	0.0133131		6882	0.0129482	-1	0.201976
51754	0.000855119	1	0.0133258		54801	0.0129987	-1	0.202566
151556	0.000859799	-1	0.0133857		85363	0.0130237	-1	0.202758
2975	0.000869706	1	0.0134932		2257	0.0131187	1	0.203138
23136	0.000870093	-1	0.0134932		9420	0.0131085	-1	0.203138
26999	0.000868407	-1	0.0134932		9450	0.0131246	-1	0.203138
59340	0.000869559	1	0.0134932		22915	0.0130781	-1	0.203138
2017	0.000878089	1	0.013604		51575	0.0131003	-1	0.203138
3140	0.000883582	-1	0.0136758		57582	0.0130728	1	0.203138
30011	0.000912475	-1	0.0141093		3429	0.0131505	-1	0.203342
133619	0.000913863	1	0.0141171		163033	0.0131725	1	0.203484
201514	0.000914783	1	0.0141176		4588	0.0131964	1	0.203656
2358	0.000918734	-1	0.0141648		5732	0.0132556	-1	0.204301
25975	0.00092772	-1	0.0142896		139135	0.0132638	1	0.204301
3875	0.000958973	1	0.0147538		51009	0.0132874	-1	0.204466
55733	0.000959711	1	0.0147538		54799	0.0133248	1	0.204845
5641	0.000962287	-1	0.0147792		171482	0.0133535	1	0.205087
118788	0.000963721	-1	0.014787		10461	0.0133834	-1	0.205349
55840	0.000965811	-1	0.0148048		758	0.0136432	1	0.205807
2301	0.000970232	1	0.0148583		1609	0.0135827	1	0.205807
5883	0.000974568	1	0.0148871		1674	0.0136456	1	0.205807
6517	0.00097585	1	0.0148871		2251	0.0134648	1	0.205807
64386	0.000975467	-1	0.0148871		5800	0.0135752	1	0.205807
340061	0.000975125	-1	0.0148871		5989	0.0135724	1	0.205807
10006	0.00099134	-1	0.0150945		7518	0.013587	-1	0.205807
169611	0.000990497	1	0.0150945		7572	0.0135994	-1	0.205807
7379	0.00099337	1	0.015111		8643	0.013637	1	0.205807
211	0.000994897	-1	0.0151173		10479	0.0134841	-1	0.205807
1949	0.00099694	1	0.0151173		23172	0.0136069	-1	0.205807
5613	0.000997392	-1	0.0151173		23398	0.01357	-1	0.205807
6909	0.000998528	1	0.0151173		55922	0.0135593	-1	0.205807
10042	0.000998104	1	0.0151173		56269	0.0135073	1	0.205807
9500	0.00100351	1	0.0151783		79088	0.0135253	-1	0.205807
9162	0.00101164	1	0.0152522		79144	0.0135134	1	0.205807
23484	0.00101222	-1	0.0152522		79153	0.0136414	1	0.205807
84191	0.00101216	-1	0.0152522		170302	0.0136411	1	0.205807
139212	0.00101115	1	0.0152522		56896	0.0136756	1	0.206064
100144748	0.00101453	1	0.0152726		83448	0.0137368	-1	0.206402
5159	0.0010168	1	0.0152922		84061	0.0137147	-1	0.206402
9709	0.00102029	-1	0.0153303		90249	0.0137286	1	0.206402
5507	0.00102257	1	0.0153363		55621	0.0137646	-1	0.206624
91662	0.00102261	1	0.0153363		9727	0.0138203	1	0.207265
57168	0.00102779	-1	0.0153994		2268	0.0138749	-1	0.207499
146754	0.00103453	1	0.0154859		10558	0.0138525	-1	0.207499
4148	0.00104273	1	0.015594		10993	0.0138685	-1	0.207499
3558	0.00104747	-1	0.0156501		23479	0.0138988	-1	0.207661
11054	0.00105163	-1	0.0156903		325	0.0139597	1	0.207792
57419	0.00105212	1	0.0156903		11173	0.0139335	1	0.207792
1389	0.00105847	-1	0.0157702		64127	0.0139529	-1	0.207792
81844	0.00106822	-1	0.0159006		91074	0.0139512	1	0.207792
3206	0.00106996	1	0.0159116		1326	0.0139905	-1	0.208002
4155	0.00107405	-1	0.0159201		9958	0.0140129	-1	0.208002
51148	0.00107452	1	0.0159201		84527	0.0140055	-1	0.208002
94032	0.00107419	1	0.0159201		526	0.0140747	-1	0.208075
136895	0.00107286	-1	0.0159201		3680	0.0140552	1	0.208075
115352	0.00107564	-1	0.0159218		6001	0.0140831	-1	0.208075
5729	0.00107712	-1	0.015929		8726	0.014083	-1	0.208075
5199	0.001081	-1	0.0159715		84444	0.0140709	1	0.208075
440699	0.00108512	1	0.0160176		1305	0.0141311	1	0.208166
115560	0.00108903	1	0.0160604		1535	0.0141669	-1	0.208166
79156	0.00109408	-1	0.01612		2013	0.0141512	1	0.208166
5732	0.00109515	-1	0.0161209		6509	0.0141937	1	0.208166
56903	0.00109727	1	0.0161372		8900	0.0141701	-1	0.208166
114757	0.00110013	1	0.0161643		85320	0.0141316	1	0.208166
92370	0.00110879	1	0.0162633		85451	0.0141579	1	0.208166
221178	0.00110891	-1	0.0162633		283149	0.014191	1	0.208166
26031	0.00111801	-1	0.0163816		27	0.0142836	-1	0.208491
226	0.00113456	1	0.016609		9556	0.0142721	-1	0.208491
862	0.00113649	1	0.0166219		25873	0.0142891	-1	0.208491
51166	0.00113854	1	0.0166366		79780	0.0142412	-1	0.208491
50863	0.00114313	1	0.0166885		94160	0.0142944	1	0.208491
1954	0.00114755	1	0.0167376		127396	0.0142518	-1	0.208491
647310	0.00115104	1	0.0167732		5983	0.014311	-1	0.208543
7980	0.0011587	-1	0.0168694		23524	0.0143363	1	0.208721
64838	0.00116238	1	0.0169076		90594	0.0144171	-1	0.209525
4146	0.00116671	1	0.0169551		205147	0.0144178	1	0.209525
84189	0.00116805	1	0.0169591		51530	0.0144331	-1	0.209555
3069	0.00117378	1	0.0170112		9655	0.0144671	-1	0.209667
27245	0.00117319	1	0.0170112		93109	0.0144562	1	0.209667
83852	0.00117588	-1	0.0170262		2207	0.0145237	-1	0.210106
51291	0.0011779	-1	0.01704		142686	0.014514	1	0.210106
80210	0.00118314	1	0.0171003		84265	0.0145385	-1	0.210129
55727	0.00118657	1	0.0171343		154	0.0146711	-1	0.211137
4760	0.0011879	1	0.0171381		6319	0.014682	1	0.211137
63876	0.00119851	1	0.0172755		26173	0.0146877	1	0.211137
121227	0.00120361	1	0.0173333		54809	0.0146787	-1	0.211137
3290	0.00120569	-1	0.0173476		65989	0.0146221	1	0.211137
864	0.00120791	-1	0.0173638		79145	0.0146848	-1	0.211137
3595	0.00121018	-1	0.0173808		5378	0.0147266	1	0.211363
80031	0.0012119	1	0.0173899		56892	0.0147299	-1	0.211363
439921	0.00121552	1	0.0174261		7752	0.0147652	-1	0.211679
11276	0.00122569	-1	0.0175403		11037	0.0147902	-1	0.211847
80736	0.00122525	1	0.0175403		865	0.014879	-1	0.212165
81615	0.00122754	-1	0.017551		1496	0.0148595	1	0.212165
1152	0.00123147	1	0.01756		2001	0.0148652	-1	0.212165
54436	0.0012301	-1	0.01756		9687	0.0148382	1	0.212165
84518	0.00123133	1	0.01756		80712	0.0148788	1	0.212165
6991	0.0012341	1	0.0175817		5966	0.0149101	-1	0.212419
23396	0.00123591	1	0.0175864		79724	0.0149494	1	0.212656
27327	0.00123798	1	0.0175864		115106	0.0149534	-1	0.212656
140686	0.00123884	1	0.0175864		126410	0.0149697	1	0.212699
402381	0.00123845	1	0.0175864		7753	0.01506	-1	0.212843
7694	0.00124181	1	0.0176113		9046	0.0150553	-1	0.212843
64863	0.00124391	-1	0.0176113		25847	0.0150579	1	0.212843
81577	0.00124362	1	0.0176113		51669	0.0150582	-1	0.212843
631	0.00124625	1	0.0176288		119391	0.015035	1	0.212843
5031	0.00124991	-1	0.0176649		494115	0.0149952	-1	0.212843
54829	0.00125385	1	0.017705		5979	0.0150944	1	0.213139
1048	0.00126022	1	0.0177151		5798	0.0151715	1	0.213849
3993	0.00125667	1	0.0177151		55627	0.0151648	1	0.213849
6328	0.00125831	-1	0.0177151		1209	0.0152192	1	0.214241
25837	0.00125841	1	0.0177151		5001	0.0152261	-1	0.214241
27197	0.00125981	-1	0.0177151		6557	0.0152775	1	0.214392
147184	0.00126124	1	0.0177151		256536	0.0152654	1	0.214392
54897	0.00127046	1	0.0178289		284069	0.0152906	1	0.214392
91752	0.00127342	-1	0.0178548		388323	0.0152634	1	0.214392
196	0.00127656	-1	0.0178831		329	0.0153125	-1	0.214509
2801	0.00129398	1	0.0180952		9400	0.0153615	1	0.214729
11075	0.0012938	1	0.0180952		57167	0.0153431	1	0.214729
23406	0.00132155	-1	0.0184646		152100	0.0153686	-1	0.214729
9902	0.00132482	1	0.0184647		143689	0.0154818	-1	0.216121
126868	0.00132408	1	0.0184647		29121	0.0155304	-1	0.216233
401546	0.00132503	1	0.0184647		57480	0.0155276	-1	0.216233
55625	0.00133149	1	0.0185385		90871	0.0155164	-1	0.216233
7068	0.00133409	1	0.0185586		2907	0.0156423	1	0.216866
214	0.00133637	1	0.0185741		7252	0.0155989	1	0.216866
836	0.00134508	-1	0.0186789		7405	0.0156273	-1	0.216866
84787	0.0013485	1	0.01871		7976	0.0156711	-1	0.216866
389289	0.00135561	-1	0.0187923		9880	0.01566	-1	0.216866
1445	0.00136496	-1	0.018889		130013	0.0156658	1	0.216866
642987	0.00136465	1	0.018889		221692	0.0156081	-1	0.216866
2322	0.00136698	-1	0.0189006		23673	0.015701	-1	0.21709
9711	0.0013715	-1	0.0189467		1436	0.0157344	-1	0.217221
1906	0.0013819	1	0.0190738		1822	0.0157717	1	0.217221
64065	0.00138337	1	0.0190775		2157	0.0157559	-1	0.217221
145501	0.00138818	1	0.0191274		23012	0.0157786	-1	0.217221
1237	0.00139259	-1	0.0191715		23601	0.0157674	-1	0.217221
9253	0.00139583	1	0.0191996		268	0.0159683	1	0.21769
90273	0.00139888	-1	0.0192249		1384	0.015986	1	0.21769
60482	0.00140193	1	0.0192503		2212	0.0159459	-1	0.21769
51665	0.00141121	1	0.019361		2820	0.0158822	1	0.21769
165904	0.00141526	-1	0.0194		2959	0.0160766	-1	0.21769
51303	0.00141814	-1	0.0194226		3569	0.0159129	-1	0.21769
23241	0.00142081	1	0.0194425		5428	0.0161036	1	0.21769
81889	0.00142257	1	0.01945		5777	0.0160473	-1	0.21769
23093	0.00142401	1	0.0194529		6604	0.0161085	1	0.21769
26658	0.00143482	1	0.0195838		8538	0.0160474	-1	0.21769
113230	0.00143606	1	0.019584		8861	0.0159478	1	0.21769
3227	0.00144565	1	0.0196811		10210	0.016154	-1	0.21769
5366	0.00144458	-1	0.0196811		10282	0.0160727	-1	0.21769
9290	0.00145413	-1	0.0197796		29982	0.0161341	-1	0.21769
27254	0.00145603	1	0.0197885		51167	0.0158962	-1	0.21769
51225	0.00146704	-1	0.0199212		51540	0.01584	1	0.21769
54587	0.00147765	1	0.0200483		51691	0.0158648	-1	0.21769
8732	0.00148224	-1	0.0200934		54522	0.0159997	-1	0.21769
80139	0.00148398	1	0.0200999		64222	0.0161327	-1	0.21769
1557	0.00149265	1	0.0202002		80728	0.0160052	1	0.21769
3589	0.00150517	1	0.0203447		90843	0.0161055	-1	0.21769
6581	0.00150984	-1	0.0203447		115761	0.0158599	-1	0.21769
51699	0.00150723	-1	0.0203447		140688	0.0161208	1	0.21769
54328	0.00151098	1	0.0203447		158358	0.0161473	-1	0.21769
55803	0.00150901	-1	0.0203447		644353	0.0160841	-1	0.21769
94160	0.00150933	1	0.0203447		1027	0.016174	-1	0.217776
57818	0.00152205	1	0.0204764		4879	0.0162052	1	0.218011
635	0.00152835	1	0.0205438		4633	0.0162419	1	0.218137
8454	0.0015315	-1	0.0205688		100505573	0.0162298	-1	0.218137
56967	0.0015339	1	0.0205837		11062	0.0163219	-1	0.218698
29954	0.0015439	1	0.0207005		25837	0.0163249	1	0.218698
2050	0.00155369	1	0.0208067		116224	0.0163079	-1	0.218698
222389	0.00155443	1	0.0208067		9564	0.0163504	1	0.218857
8428	0.00155953	1	0.0208573		57823	0.0163916	-1	0.219224
399473	0.0015615	1	0.0208662		8340	0.016406	1	0.219232
5961	0.00156313	1	0.0208706		4942	0.0164552	-1	0.219338
55167	0.00156473	-1	0.0208744		11247	0.016449	1	0.219338
59342	0.00156641	-1	0.0208771		29766	0.0164514	-1	0.219338
64855	0.00156755	1	0.0208771		7008	0.0165114	1	0.219721
6999	0.00157587	-1	0.0209704		7091	0.0165081	-1	0.219721
9622	0.00158192	1	0.0210241		1016	0.0166054	1	0.220041
51218	0.00158255	1	0.0210241		3561	0.0165962	-1	0.220041
780776	0.00159506	-1	0.0211727		9911	0.0165756	1	0.220041
9980	0.00159933	1	0.0212118		11146	0.0166183	-1	0.220041
29984	0.00161031	1	0.0213397		84517	0.0165896	-1	0.220041
10473	0.00161636	-1	0.021402		139818	0.0165743	-1	0.220041
57529	0.00163533	1	0.0216353		79699	0.0166639	-1	0.220278
5062	0.00164008	-1	0.0216801		284309	0.0166574	-1	0.220278
22838	0.00164575	-1	0.0217369		2182	0.0167828	-1	0.220466
284680	0.00164816	1	0.0217508		10500	0.0167795	1	0.220466
5692	0.00165093	-1	0.0217693		23140	0.0167289	1	0.220466
285423	0.00165405	1	0.0217924		23526	0.0167982	-1	0.220466
55764	0.00166169	1	0.021857		51478	0.0168025	1	0.220466
134429	0.00166125	-1	0.021857		55144	0.0167289	-1	0.220466
7586	0.00167118	1	0.0219637		55422	0.0167876	-1	0.220466
730	0.00167557	-1	0.0220033		90865	0.0167294	-1	0.220466
90203	0.00168431	1	0.0220998		101929926	0.0167533	1	0.220466
389336	0.00168973	1	0.0221527		1512	0.0168792	-1	0.220564
8139	0.0016963	1	0.0222023		3071	0.0168769	-1	0.220564
8224	0.00169571	1	0.0222023		5119	0.0168273	1	0.220564
9771	0.00169864	1	0.0222147		8924	0.0168469	1	0.220564
54848	0.00171321	1	0.0223869		10842	0.0168726	1	0.220564
1907	0.00173403	1	0.0226033		406	0.0169015	-1	0.220674
10896	0.00173138	1	0.0226033		4627	0.0170549	1	0.22113
23180	0.00173396	-1	0.0226033		8862	0.0170604	1	0.22113
147906	0.00173935	1	0.0226542		9412	0.0170319	-1	0.22113
53405	0.00174459	-1	0.0227039		57403	0.0170409	1	0.22113
4688	0.00174615	-1	0.0227056		57584	0.0170612	-1	0.22113
7804	0.00176047	-1	0.0228732		63027	0.0169745	1	0.22113
283373	0.00177266	1	0.0230128		65109	0.017048	-1	0.22113
7274	0.0017778	1	0.0230608		254439	0.0169652	1	0.22113
4651	0.00178458	1	0.0231037		388588	0.0169829	1	0.22113
113763	0.00178545	-1	0.0231037		57180	0.0170908	-1	0.221334
149076	0.00178385	1	0.0231037		10666	0.0171238	-1	0.221581
30811	0.00179609	1	0.0232225		1073	0.0171797	-1	0.221635
56936	0.00179769	1	0.0232243		7320	0.017181	-1	0.221635
51182	0.00180026	-1	0.0232386		10225	0.0171836	-1	0.221635
3592	0.00181069	-1	0.0233544		54931	0.0171419	-1	0.221635
2295	0.00182727	1	0.0235319		57469	0.0172028	1	0.221704
5226	0.00182741	1	0.0235319		56910	0.0172237	-1	0.22171
2705	0.00183125	1	0.0235624		79770	0.0172311	-1	0.22171
116379	0.00184546	-1	0.0237261		4298	0.0172636	1	0.221933
5493	0.00185277	1	0.0238009		114885	0.0172763	-1	0.221933
3301	0.00185663	-1	0.0238238		952	0.0172988	-1	0.222042
51444	0.00185754	-1	0.0238238		5721	0.0173397	-1	0.222053
6003	0.00187357	-1	0.02401		51538	0.0173488	-1	0.222053
124401	0.00188167	1	0.0240945		57222	0.0173449	1	0.222053
944	0.00188831	-1	0.02416		84456	0.0173553	-1	0.222053
6362	0.00190418	-1	0.0243435		4326	0.0174173	1	0.22256
51466	0.00191069	-1	0.0244072		8527	0.0174271	1	0.22256
6314	0.00192548	-1	0.0245495		50486	0.0174368	-1	0.22256
6691	0.00193074	-1	0.0245495		1944	0.017458	1	0.222652
6754	0.00193158	1	0.0245495		374899	0.0175763	1	0.223982
7252	0.00193415	1	0.0245495		4694	0.017638	-1	0.224589
23042	0.00192658	1	0.0245495		4066	0.0176867	-1	0.22493
80301	0.00193364	-1	0.0245495		219348	0.017693	-1	0.22493
90701	0.00192413	-1	0.0245495		11218	0.0177182	-1	0.225013
100170229	0.00192834	1	0.0245495		54869	0.0177278	1	0.225013
387119	0.00193969	-1	0.0246002		924	0.0177745	-1	0.225426
3914	0.00194469	1	0.0246441		11234	0.0178481	-1	0.226111
79872	0.00194676	-1	0.0246507		29080	0.017871	-1	0.226111
3291	0.00195136	1	0.0246698		80014	0.0178637	1	0.226111
401124	0.00194982	-1	0.0246698		401097	0.0179282	-1	0.226655
64236	0.00196845	1	0.0248465		83933	0.017986	1	0.227206
84253	0.00196707	1	0.0248465		116068	0.0180253	-1	0.227521
51371	0.00197452	-1	0.0249033		7850	0.0180708	-1	0.227735
120224	0.00198378	1	0.0250004		57343	0.0180689	-1	0.227735
196051	0.00198994	1	0.0250582		3064	0.0181135	1	0.227763
57205	0.00200323	-1	0.0252056		90060	0.0181005	1	0.227763
57480	0.00200937	-1	0.0252629		245932	0.0181281	1	0.227763
89	0.00201477	1	0.0252711		644186	0.0181302	1	0.227763
8869	0.00201436	-1	0.0252711		23138	0.0181643	1	0.228012
51673	0.00201431	1	0.0252711		9525	0.0182284	-1	0.228612
51510	0.00202052	-1	0.0253232		23187	0.0182408	1	0.228612
80169	0.00202535	-1	0.0253638		478	0.0183927	1	0.228803
11015	0.0020273	1	0.0253683		4849	0.0184604	1	0.228803
57379	0.00203494	-1	0.0254439		5277	0.0184943	-1	0.228803
79977	0.00205753	1	0.0257062		5935	0.0183809	-1	0.228803
80774	0.00205921	-1	0.0257068		7317	0.0184795	1	0.228803
645027	0.0020608	1	0.0257068		23189	0.0184168	-1	0.228803
127795	0.00207121	1	0.0258164		27163	0.0184851	-1	0.228803
79170	0.00207497	1	0.0258431		27327	0.0185144	1	0.228803
840	0.00207958	-1	0.0258802		51562	0.0184355	-1	0.228803
1286	0.00209	-1	0.0259897		55601	0.0182946	-1	0.228803
116986	0.00209338	-1	0.0260103		55659	0.0183507	-1	0.228803
169966	0.00209492	1	0.0260103		55824	0.0184013	-1	0.228803
51517	0.00210175	1	0.0260748		57699	0.0183604	-1	0.228803
53827	0.0021091	-1	0.0261457		84333	0.0185113	-1	0.228803
2317	0.00212654	1	0.0263216		84464	0.0184858	1	0.228803
6357	0.0021266	-1	0.0263216		84795	0.018306	1	0.228803
5801	0.00213631	1	0.0264213		126353	0.018361	1	0.228803
8226	0.00216427	-1	0.0267464		389203	0.0183922	-1	0.228803
81628	0.00217289	-1	0.0268321		5199	0.0185584	-1	0.229169
7105	0.00217465	1	0.0268331		5267	0.018602	1	0.22953
10094	0.00217718	-1	0.0268435		4654	0.018662	1	0.229737
1917	0.00218588	1	0.02693		27239	0.0186524	1	0.229737
253635	0.00218773	-1	0.0269319		51065	0.0186398	-1	0.229737
2013	0.00219626	1	0.027016		181	0.0188533	1	0.230206
55812	0.00219851	1	0.0270229		663	0.0188966	-1	0.230206
285852	0.00220292	1	0.0270562		951	0.0189744	-1	0.230206
9223	0.0022168	1	0.0272057		2744	0.0189715	-1	0.230206
10923	0.00223352	-1	0.0273898		2886	0.0189291	1	0.230206
22801	0.002239	1	0.027436		5147	0.0188827	-1	0.230206
391	0.00224498	-1	0.0274459		5976	0.0188475	1	0.230206
2901	0.00224454	1	0.0274459		6499	0.0188274	1	0.230206
5168	0.00224383	-1	0.0274459		8553	0.0188474	1	0.230206
4811	0.00226078	1	0.0276179		11226	0.0188653	1	0.230206
87	0.00227619	1	0.0277688		26034	0.0189288	-1	0.230206
7249	0.00227836	1	0.0277688		27230	0.0187361	-1	0.230206
131920	0.00227779	1	0.0277688		51185	0.0188338	-1	0.230206
1514	0.00229707	-1	0.0279755		55064	0.018959	1	0.230206
246213	0.00231391	1	0.028159		55224	0.0188627	1	0.230206
2880	0.00232064	1	0.0282194		56946	0.0188428	-1	0.230206
1807	0.00232783	-1	0.0282852		114908	0.0189382	-1	0.230206
1289	0.00233056	1	0.0282969		115811	0.0187695	1	0.230206
10730	0.00233243	-1	0.028298		154043	0.0189155	1	0.230206
118987	0.00233733	1	0.0283359		1087	0.0190235	1	0.230626
22990	0.00234495	-1	0.0284067		10562	0.0190885	-1	0.231203
10079	0.00237123	1	0.0287032		23476	0.0191436	1	0.231203
9228	0.00237748	1	0.0287571		91603	0.0191342	-1	0.231203
2804	0.00238271	1	0.0287984		157313	0.0191364	-1	0.231203
28962	0.00238576	-1	0.0288134		729830	0.0191088	1	0.231203
5351	0.00239051	1	0.0288489		3608	0.0192101	-1	0.231654
26030	0.00239908	1	0.0289306		23013	0.0191969	1	0.231654
2260	0.00241064	1	0.0290479		9709	0.0192289	-1	0.231705
8408	0.00242793	1	0.0292342		10557	0.0192944	-1	0.23197
5145	0.00243141	1	0.0292449		27043	0.0192916	1	0.23197
5317	0.00243249	1	0.0292449		55959	0.0192773	-1	0.23197
2526	0.00243852	-1	0.0292576		54822	0.019318	-1	0.232078
4208	0.00243693	-1	0.0292576		29087	0.0193769	-1	0.23261
9671	0.00244192	1	0.0292576		140458	0.0194238	1	0.232998
23216	0.0024409	-1	0.0292576		8260	0.0194479	-1	0.233026
126298	0.00244272	1	0.0292576		9091	0.01947	1	0.233026
3226	0.00247905	1	0.0296704		25758	0.0194598	-1	0.233026
3207	0.00249047	1	0.0297848		7033	0.0195629	1	0.233612
83895	0.00249402	1	0.0298048		7468	0.0195485	1	0.233612
51314	0.00249704	-1	0.0298186		94234	0.0195408	-1	0.233612
1301	0.0025052	1	0.0298549		3553	0.019593	-1	0.233622
3705	0.0025057	1	0.0298549		5696	0.0195842	-1	0.233622
27092	0.00250427	1	0.0298549		11212	0.0196342	-1	0.233763
57573	0.00251701	1	0.0299672		26059	0.0196234	1	0.233763
6307	0.00252158	1	0.0299993		7456	0.0196625	-1	0.23384
23468	0.0025358	1	0.0301459		257364	0.01967	1	0.23384
54981	0.00254198	-1	0.0301969		26098	0.0197288	-1	0.234364
1277	0.00255707	1	0.0303309		771	0.0199043	1	0.234528
2065	0.00255681	1	0.0303309		2526	0.0198964	-1	0.234528
22941	0.00256083	1	0.0303328		3691	0.0198335	1	0.234528
27106	0.00256103	-1	0.0303328		5862	0.019787	1	0.234528
10200	0.00257192	1	0.0304391		50808	0.019794	-1	0.234528
170685	0.0025787	1	0.0304968		53904	0.0198818	1	0.234528
29760	0.0025828	-1	0.0305226		57731	0.01984	1	0.234528
1464	0.00258978	1	0.0305598		65981	0.019838	-1	0.234528
27286	0.00258889	1	0.0305598		79868	0.019835	-1	0.234528
8767	0.00259664	-1	0.0306037		114926	0.0198841	-1	0.234528
138151	0.00259734	1	0.0306037		159013	0.0199044	-1	0.234528
57692	0.00260343	1	0.0306391		2301	0.0199301	1	0.234657
64800	0.00260419	1	0.0306391		9466	0.0200112	-1	0.235437
30850	0.00260905	1	0.0306736		22997	0.020033	1	0.235521
4915	0.00261577	1	0.03073		55664	0.0200696	-1	0.235777
9245	0.00262039	1	0.0307616		54918	0.0200857	-1	0.235793
83937	0.0026292	-1	0.0308423		3834	0.0201284	1	0.23612
80004	0.00264006	1	0.030947		6748	0.0202788	-1	0.23771
6789	0.00264682	-1	0.0309806		6911	0.0203282	1	0.238113
131566	0.00264589	1	0.0309806		2188	0.020386	-1	0.23844
1117	0.00265514	-1	0.0310544		4294	0.0203758	1	0.23844
283933	0.00265702	1	0.0310544		56160	0.0204297	-1	0.238776
255022	0.0026593	1	0.0310583		2618	0.0205917	-1	0.239018
79148	0.00266248	1	0.0310727		9388	0.0206003	-1	0.239018
133	0.00267208	1	0.0311618		26258	0.0205323	-1	0.239018
8932	0.00268527	-1	0.0312928		27334	0.0205582	-1	0.239018
953	0.00268749	-1	0.0312958		54558	0.0205196	1	0.239018
9641	0.00269154	-1	0.0313201		57050	0.0205525	-1	0.239018
4610	0.00269737	-1	0.031365		79768	0.0205895	-1	0.239018
6690	0.00270248	1	0.0313986		143384	0.0205528	-1	0.239018
26086	0.00270419	1	0.0313986		261734	0.0205642	1	0.239018
27302	0.00270848	1	0.0314027		284369	0.0205293	1	0.239018
54899	0.00270687	-1	0.0314027		8309	0.0206615	1	0.239553
1240	0.00271461	-1	0.0314279		54674	0.0207002	-1	0.239827
83758	0.00271362	-1	0.0314279		2926	0.0207294	-1	0.239991
3225	0.00272239	1	0.0314759		89890	0.0207563	-1	0.240071
9371	0.0027227	1	0.0314759		221120	0.0207664	-1	0.240071
1901	0.00272769	-1	0.031488		6529	0.0207905	1	0.240175
4329	0.00272733	1	0.031488		81	0.0211304	1	0.240628
56605	0.00273262	-1	0.031522		272	0.0212159	-1	0.240628
25791	0.00274071	1	0.0315925		656	0.0212607	1	0.240628
4993	0.00274629	1	0.031634		1500	0.020909	1	0.240628
3101	0.00275156	-1	0.0316717		2658	0.0210792	1	0.240628
54894	0.00278523	1	0.0320361		3488	0.0212825	1	0.240628
10924	0.00280509	-1	0.0322414		4063	0.0212743	-1	0.240628
23456	0.00282332	-1	0.0324275		6191	0.021098	-1	0.240628
80380	0.00282545	-1	0.0324286		6646	0.0209523	-1	0.240628
7321	0.00283355	-1	0.0324806		7411	0.0210669	-1	0.240628
148066	0.00283405	1	0.0324806		8888	0.0212259	1	0.240628
9806	0.00285353	-1	0.0326803		10999	0.0209878	1	0.240628
9317	0.00286604	-1	0.0328001		22877	0.0212624	1	0.240628
80000	0.0028882	1	0.0330299		51067	0.0209996	-1	0.240628
131375	0.00289094	1	0.0330376		54881	0.0209927	-1	0.240628
7078	0.00289646	1	0.033077		55454	0.0211628	-1	0.240628
9863	0.00290347	1	0.0331332		55709	0.0209614	-1	0.240628
58472	0.00290639	-1	0.0331428		57826	0.0210441	-1	0.240628
2857	0.0029172	-1	0.0332423		79002	0.0212459	-1	0.240628
23268	0.00292137	1	0.0332661		79101	0.0211397	-1	0.240628
3209	0.00292578	1	0.0332925		79982	0.0212398	-1	0.240628
57121	0.00293186	-1	0.0333379		84240	0.0211339	-1	0.240628
23085	0.00293456	1	0.0333448		84890	0.0212637	-1	0.240628
4237	0.00294296	1	0.0334164		89782	0.0209419	1	0.240628
8996	0.00295147	1	0.0334892		129807	0.0211532	1	0.240628
8776	0.00296533	-1	0.0336226		164045	0.0209828	1	0.240628
4601	0.00297658	1	0.0336825		170482	0.0209629	-1	0.240628
83641	0.00297663	-1	0.0336825		196403	0.0209449	1	0.240628
90865	0.00297696	-1	0.0336825		255762	0.0210495	1	0.240628
1105	0.00298441	-1	0.0337429		284352	0.0211198	1	0.240628
6095	0.00299134	-1	0.0337733		57761	0.0212991	1	0.240645
80012	0.00299054	-1	0.0337733		10458	0.0213334	1	0.240862
6367	0.00299981	-1	0.0337972		3567	0.0213777	1	0.24102
7405	0.00299894	-1	0.0337972		6095	0.0213744	-1	0.24102
53905	0.00299905	1	0.0337972		3301	0.0214196	-1	0.241152
3426	0.00302256	-1	0.0340294		22944	0.0214096	-1	0.241152
196472	0.00302712	1	0.0340567		4854	0.0214811	1	0.241249
8675	0.00303242	-1	0.0340922		29957	0.0214596	1	0.241249
2045	0.00303731	1	0.0341232		56203	0.0214772	1	0.241249
9531	0.00305117	1	0.0342547		100287482	0.0214888	-1	0.241249
886	0.00306145	1	0.034346		774	0.0215668	1	0.241955
54985	0.00306631	1	0.0343763		7743	0.0216053	-1	0.242061
124491	0.00308531	-1	0.034565		11180	0.0216066	1	0.242061
126069	0.00308905	1	0.0345826		100533178	0.021672	1	0.242623
9463	0.00310576	1	0.0347453		89870	0.0216893	1	0.242646
79098	0.00311254	1	0.0347968		7105	0.0217072	-1	0.242676
3305	0.00312815	-1	0.0349069		22822	0.0217597	-1	0.243093
3576	0.00312897	1	0.0349069		80124	0.0218378	-1	0.243794
54796	0.00312796	1	0.0349069		3662	0.0218667	-1	0.243847
7772	0.00313248	1	0.0349216		9501	0.0218884	1	0.243847
84629	0.00313831	1	0.0349622		80173	0.0218787	-1	0.243847
5900	0.00315262	-1	0.0350971		29090	0.0219316	-1	0.24414
22895	0.00315981	1	0.0351281		134526	0.0219454	1	0.24414
114904	0.00315974	1	0.0351281		3157	0.0219643	1	0.24418
23099	0.0031632	1	0.0351413		4507	0.022027	-1	0.244197
3566	0.00318344	-1	0.0352924		57393	0.0219977	-1	0.244197
5055	0.0031812	1	0.0352924		83483	0.0220153	1	0.244197
23550	0.0031821	-1	0.0352924		84985	0.021989	1	0.244197
10081	0.0032165	1	0.0356341		84203	0.022052	1	0.244304
6507	0.0032358	-1	0.0357981		1953	0.0221266	1	0.24496
6833	0.00323387	1	0.0357981		220134	0.0221481	-1	0.245028
1395	0.00324419	1	0.0358371		7773	0.0221842	-1	0.245257
79774	0.00324607	1	0.0358371		10059	0.0222402	-1	0.245705
127003	0.00324273	1	0.0358371		1397	0.0223748	1	0.246691
2896	0.00325196	-1	0.0358714		3188	0.0223732	-1	0.246691
91833	0.00325367	1	0.0358714		6778	0.0224068	-1	0.246691
9435	0.00327261	-1	0.0360114		79627	0.0223941	-1	0.246691
9843	0.00326878	1	0.0360114		92292	0.022386	1	0.246691
137835	0.00327315	-1	0.0360114		5746	0.0224669	-1	0.247182
58515	0.00327767	-1	0.0360363		1147	0.0224855	-1	0.247216
144811	0.00328404	-1	0.0360814		143684	0.0225113	-1	0.24733
55315	0.00328656	-1	0.0360843		27339	0.0225919	1	0.248044
120065	0.00329047	1	0.0361023		5664	0.0226326	1	0.24832
6646	0.00329943	-1	0.0361757		8798	0.0226644	-1	0.248327
389337	0.00331924	1	0.0363679		157638	0.022663	1	0.248327
10631	0.00332337	1	0.0363882		4634	0.0227037	1	0.248422
339500	0.00333271	-1	0.0364654		79192	0.0227043	-1	0.248422
57569	0.00333884	1	0.0365074		126375	0.0227203	-1	0.248427
23305	0.0033661	-1	0.0367802		112495	0.0227778	-1	0.248545
22820	0.00337314	1	0.0368319		122622	0.0227619	1	0.248545
55604	0.00337844	1	0.0368645		255189	0.0227763	1	0.248545
222194	0.00338346	-1	0.036894		56674	0.0228306	-1	0.24895
79962	0.00338669	1	0.0369041		116986	0.0228548	1	0.249044
79088	0.00341229	1	0.0371576		222	0.0229762	1	0.249559
200916	0.00341631	-1	0.037176		7262	0.0229593	1	0.249559
27019	0.00343158	1	0.0373166		80823	0.0229616	-1	0.249559
11010	0.00343804	-1	0.0373614		96764	0.0229476	-1	0.249559
1032	0.00344472	-1	0.0373831		344787	0.0229803	1	0.249559
654254	0.00344446	1	0.0373831		5567	0.0230392	-1	0.250028
7058	0.00344937	1	0.0374081		84079	0.0230604	-1	0.250087
5414	0.00345576	1	0.0374264		27152	0.023087	1	0.250206
84547	0.0034557	1	0.0374264		1145	0.0231337	1	0.250371
653319	0.00346828	1	0.0375365		10809	0.0231194	1	0.250371
10526	0.003478	1	0.0376162		148479	0.0231984	1	0.250732
4057	0.00348971	-1	0.0376917		158763	0.0231845	-1	0.250732
84193	0.00348818	1	0.0376917		1593	0.0232156	-1	0.250748
256126	0.00349902	1	0.0377667		55304	0.0232714	-1	0.25101
1953	0.00351092	1	0.0378558		402778	0.0232614	1	0.25101
7005	0.00351202	1	0.0378558		1767	0.023511	1	0.251318
9856	0.00352149	1	0.0378612		2882	0.0234457	-1	0.251318
10607	0.00351541	1	0.0378612		4808	0.023324	1	0.251318
26689	0.00352276	1	0.0378612		5627	0.0235401	-1	0.251318
79783	0.00352441	1	0.0378612		7409	0.0234302	-1	0.251318
387856	0.00351993	1	0.0378612		8609	0.0236153	1	0.251318
92565	0.00353538	1	0.0379535		8612	0.0234931	1	0.251318
246329	0.00353864	-1	0.037963		8632	0.0235651	1	0.251318
6659	0.00354548	1	0.0380107		8820	0.0234906	-1	0.251318
1594	0.00355208	-1	0.038056		51569	0.0234262	-1	0.251318
55916	0.00356013	-1	0.0381166		55603	0.0235468	-1	0.251318
7042	0.00356566	1	0.0381502		55773	0.0234694	-1	0.251318
64792	0.00357443	1	0.0381927		57648	0.0235619	1	0.251318
121268	0.00357249	-1	0.0381927		64919	0.0235793	-1	0.251318
5275	0.00358136	1	0.0382412		80833	0.0236025	-1	0.251318
58492	0.0035854	1	0.0382587		81033	0.0233676	1	0.251318
51226	0.00360439	1	0.0384356		125228	0.0236098	-1	0.251318
4543	0.00361022	1	0.038472		140730	0.023419	1	0.251318
23201	0.00363845	1	0.038747		140739	0.0235252	-1	0.251318
129531	0.00365074	-1	0.0388519		221061	0.0235965	-1	0.251318
23479	0.00365938	-1	0.0389178		953	0.0236342	-1	0.251352
421	0.00368742	1	0.0391245		9712	0.0237131	-1	0.252022
5216	0.00368863	-1	0.0391245		9149	0.0237748	1	0.252174
9564	0.00368425	1	0.0391245		10457	0.0237734	-1	0.252174
84314	0.0036851	1	0.0391245		22837	0.0237447	1	0.252174
147409	0.00369167	1	0.0391307		515	0.0239339	-1	0.252311
348093	0.00369709	1	0.0391622		2813	0.0239416	1	0.252311
51727	0.00371248	1	0.0392991		4092	0.0239171	-1	0.252311
7593	0.00372605	1	0.0394165		9306	0.0239117	-1	0.252311
131873	0.00373347	-1	0.0394689		27235	0.0238367	-1	0.252311
2706	0.00374868	1	0.0395717		58158	0.0239405	1	0.252311
9026	0.00374627	1	0.0395717		64098	0.0239104	-1	0.252311
51422	0.00375313	-1	0.0395717		84074	0.023946	1	0.252311
56097	0.00375215	1	0.0395717		200844	0.0238306	1	0.252311
162461	0.00375572	1	0.0395728		255919	0.023913	-1	0.252311
201799	0.00376247	-1	0.0396178		1241	0.0242125	1	0.252641
476	0.00377188	1	0.0396798		2880	0.0242843	1	0.252641
84765	0.00377334	1	0.0396798		3215	0.0240529	1	0.252641
22862	0.00380295	-1	0.0399648		3930	0.0241709	-1	0.252641
642938	0.00381286	1	0.0400426		7433	0.0242059	1	0.252641
493869	0.00382388	1	0.0401319		9111	0.0242915	-1	0.252641
1909	0.00383361	1	0.0401811		9363	0.0242559	-1	0.252641
2885	0.00383342	-1	0.0401811		10351	0.0242415	-1	0.252641
63971	0.00383687	1	0.0401888		29088	0.024236	-1	0.252641
3354	0.0038494	1	0.0402382		55124	0.0242734	1	0.252641
10699	0.00385168	1	0.0402382		55349	0.0242942	1	0.252641
27023	0.00384961	1	0.0402382		55680	0.0242585	1	0.252641
93233	0.003846	1	0.0402382		58475	0.0241079	-1	0.252641
1272	0.00386326	1	0.0403328		83861	0.0240428	1	0.252641
26003	0.00388718	1	0.0405559		94025	0.024143	-1	0.252641
4154	0.0039224	-1	0.0408966		117286	0.0241454	1	0.252641
25821	0.00392618	-1	0.0409092		149483	0.0242634	1	0.252641
3299	0.00392974	1	0.0409196		221037	0.0240025	-1	0.252641
23362	0.00394739	1	0.0410702		284001	0.0241996	1	0.252641
51177	0.00395193	-1	0.0410702		339541	0.0242521	-1	0.252641
145407	0.00395069	1	0.0410702		26000	0.0243128	1	0.25267
2916	0.00395638	1	0.0410897		471	0.0244135	1	0.252886
56892	0.00396269	-1	0.0411284		3617	0.0244107	1	0.252886
9674	0.00400403	-1	0.0415304		6793	0.0244105	-1	0.252886
79891	0.00400938	-1	0.0415589		10938	0.0243804	-1	0.252886
55765	0.00401423	1	0.0415821		27319	0.0244447	-1	0.252886
149473	0.00402699	1	0.0416871		55552	0.0243653	-1	0.252886
6558	0.00402971	1	0.0416883		387921	0.0244329	-1	0.252886
6197	0.00405277	-1	0.0418996		961	0.024695	-1	0.253349
4628	0.00405923	1	0.0419358		1965	0.024702	-1	0.253349
9019	0.00406153	1	0.0419358		2205	0.0247475	-1	0.253349
255626	0.00409014	1	0.0422039		4589	0.0245365	1	0.253349
4952	0.00409461	1	0.0422227		5210	0.0246408	1	0.253349
6332	0.00409749	1	0.0422251		5792	0.024761	1	0.253349
1605	0.00413079	1	0.0425408		11024	0.0247297	1	0.253349
57211	0.00413932	1	0.0426011		11063	0.0246818	1	0.253349
1103	0.00414656	1	0.0426242		28962	0.0246259	-1	0.253349
285362	0.00414692	1	0.0426242		29063	0.0247755	1	0.253349
55294	0.0041509	-1	0.0426377		51752	0.0245961	-1	0.253349
2905	0.00416473	1	0.0427247		55367	0.024604	1	0.253349
11060	0.00416284	1	0.0427247		55917	0.0245616	-1	0.253349
658	0.00417093	1	0.0427333		57590	0.0245848	-1	0.253349
10046	0.00417011	1	0.0427333		79083	0.0247698	1	0.253349
5792	0.00419988	1	0.0430022		112464	0.0245707	-1	0.253349
10362	0.00423978	1	0.0433829		113115	0.0246848	-1	0.253349
29992	0.00425629	-1	0.0435239		285521	0.0245091	-1	0.253349
26115	0.00426859	1	0.0436217		3665	0.0248206	-1	0.253509
11077	0.00427444	1	0.0436535		4753	0.0248229	-1	0.253509
4200	0.00429557	-1	0.0437292		166815	0.02491	-1	0.254235
6678	0.00428953	1	0.0437292		54504	0.0250043	-1	0.255034
7827	0.0042863	1	0.0437292		136306	0.0250234	-1	0.255066
9722	0.00429309	1	0.0437292		5620	0.0250632	1	0.25519
150590	0.00429053	1	0.0437292		6455	0.0251089	1	0.25519
140862	0.00430169	1	0.0437636		23654	0.0251407	1	0.25519
29767	0.00431766	-1	0.043898		55602	0.0251476	-1	0.25519
341	0.00432112	-1	0.0439053		56650	0.0250811	-1	0.25519
4308	0.00432832	1	0.0439503		80306	0.0251163	1	0.25519
87178	0.00433277	-1	0.0439676		200010	0.0251016	1	0.25519
5711	0.00433615	1	0.0439739		3835	0.0252047	1	0.255444
7142	0.00434971	1	0.0440553		377677	0.0251924	-1	0.255444
23174	0.00434921	1	0.0440553		57657	0.0252301	1	0.255539
55813	0.00436472	-1	0.0441793		124491	0.0252815	-1	0.255897
3682	0.00438014	-1	0.0442812		57139	0.0253218	1	0.256054
6926	0.00438034	1	0.0442812		64430	0.0253292	1	0.256054
5980	0.00438918	-1	0.0442863		3765	0.0253673	1	0.256115
10595	0.00438431	1	0.0442863		11279	0.0253548	1	0.256115
51752	0.00438856	-1	0.0442863		57561	0.0254386	-1	0.256575
7306	0.00439566	1	0.0442956		253827	0.025445	1	0.256575
23139	0.004393	1	0.0442956		196	0.0257551	-1	0.2567
3223	0.00440151	1	0.0443266		1075	0.0257166	-1	0.2567
131578	0.0044136	1	0.0444202		2197	0.025542	-1	0.2567
120892	0.00442322	-1	0.0444889		2635	0.0255983	-1	0.2567
28983	0.00442809	1	0.0445099		2954	0.0257632	1	0.2567
22943	0.00444139	1	0.0446154		5719	0.0257465	-1	0.2567
51283	0.00444932	1	0.0446669		6489	0.0258196	-1	0.2567
64857	0.00445271	1	0.0446728		7401	0.0256645	1	0.2567
25911	0.0044805	1	0.0449233		10987	0.0257247	-1	0.2567
868	0.00450273	1	0.0450895		11077	0.0255387	1	0.2567
10949	0.00450144	1	0.0450895		22982	0.0256237	1	0.2567
79664	0.00451993	-1	0.0452333		23053	0.0257693	1	0.2567
65061	0.00452335	1	0.0452392		50488	0.0257224	1	0.2567
53	0.00453552	-1	0.0452769		55156	0.0257478	-1	0.2567
9569	0.00453564	1	0.0452769		55914	0.025605	-1	0.2567
9841	0.0045305	-1	0.0452769		81492	0.0258278	1	0.2567
928	0.00454747	1	0.0453098		81833	0.0257832	1	0.2567
8537	0.00454633	1	0.0453098		84173	0.0257996	1	0.2567
126326	0.00454251	1	0.0453098		92235	0.0257565	1	0.2567
10865	0.00457169	-1	0.0455193		113220	0.025587	1	0.2567
85397	0.0045742	1	0.0455193		116113	0.0256627	1	0.2567
50507	0.00457949	1	0.0455435		375056	0.0258256	1	0.2567
6096	0.00459259	1	0.0456453		375790	0.0257194	1	0.2567
152485	0.00459793	1	0.0456699		25829	0.0259142	1	0.257307
402778	0.00460106	1	0.0456725		117156	0.0259211	-1	0.257307
6232	0.00461457	-1	0.0457781		8807	0.0259391	-1	0.257325
23225	0.00462044	-1	0.0457794		2339	0.0260217	-1	0.257454
195827	0.00461977	-1	0.0457794		9645	0.0259714	1	0.257454
5083	0.00462557	1	0.0458018		64135	0.0259944	-1	0.257454
5464	0.00466965	-1	0.0461808		80168	0.0260349	1	0.257454
64760	0.00466689	1	0.0461808		161497	0.026049	1	0.257454
5340	0.00469559	1	0.0464032		374819	0.0260302	1	0.257454
126353	0.00469795	1	0.0464032		2975	0.0260877	1	0.257677
84066	0.00470485	1	0.0464425		1854	0.0261813	-1	0.257962
9392	0.00470881	1	0.0464528		4818	0.0261555	-1	0.257962
726	0.00472253	1	0.0465306		140710	0.0261574	1	0.257962
9802	0.0047215	-1	0.0465306		643155	0.0261737	-1	0.257962
9456	0.004727	1	0.0465459		5864	0.0262028	1	0.258014
894	0.00476759	-1	0.0469166		10248	0.0262307	-1	0.25813
64224	0.00477288	-1	0.0469231		6314	0.0262749	-1	0.258385
127544	0.00477413	-1	0.0469231		55803	0.0263018	-1	0.258385
2823	0.00485672	-1	0.0477054		65055	0.0263053	1	0.258385
403	0.00486866	1	0.0477932		131408	0.0263298	1	0.258467
8590	0.00487686	1	0.0478442		2898	0.0265187	1	0.260001
3229	0.00488444	1	0.0478892		27309	0.0265146	-1	0.260001
3110	0.00489697	1	0.0479824		29855	0.026606	1	0.260563
8820	0.00490684	-1	0.0479907		83416	0.0266087	-1	0.260563
23753	0.00490175	-1	0.0479907		326	0.0267971	1	0.260681
54832	0.00490513	-1	0.0479907		2957	0.026869	1	0.260681
25763	0.00491753	1	0.0480658		4301	0.0268807	1	0.260681
776	0.0049354	1	0.0482109		4756	0.0268077	1	0.260681
3712	0.00494439	1	0.0482691		5683	0.0266793	-1	0.260681
4783	0.00495217	-1	0.0482878		10595	0.0268376	1	0.260681
84251	0.00495236	1	0.0482878		10752	0.0268824	-1	0.260681
165	0.0049658	1	0.0483892		10802	0.0266784	-1	0.260681
10161	0.0049714	-1	0.048407		51710	0.0266412	1	0.260681
10809	0.00497566	1	0.048407		55704	0.0268	-1	0.260681
25776	0.00497674	1	0.048407		81930	0.0268665	-1	0.260681
10749	0.00499474	1	0.0485525		84259	0.026715	-1	0.260681
92292	0.00500901	1	0.0486615		112483	0.0268395	-1	0.260681
9639	0.00503968	1	0.0489297		117583	0.0267278	1	0.260681
5345	0.00504662	-1	0.0489673		137964	0.0267161	-1	0.260681
400506	0.00507197	1	0.0491833		153328	0.0268111	1	0.260681
51449	0.00510557	1	0.049479		8601	0.0269319	1	0.260685
54734	0.00511657	-1	0.0495555		30062	0.0269195	1	0.260685
5095	0.00512329	1	0.0495905		138199	0.0269158	-1	0.260685
55930	0.00513141	1	0.049637		6125	0.0269579	-1	0.260727
201294	0.00513432	-1	0.049637		8453	0.0269853	-1	0.260727
8547	0.00514525	-1	0.0497125		60686	0.0269701	1	0.260727
148252	0.00515913	1	0.0498164		409	0.0270813	-1	0.26078
55421	0.00518306	1	0.0500028		712	0.0271448	-1	0.26078
387601	0.00518471	1	0.0500028		2549	0.0271934	1	0.26078
5925	0.00518873	-1	0.0500114		7536	0.0270981	1	0.26078
9034	0.00519795	-1	0.0500699		9318	0.0272034	-1	0.26078
9990	0.00521017	1	0.0501574		9531	0.0271955	1	0.26078
51490	0.00522524	1	0.050272		10898	0.027033	-1	0.26078
2829	0.00523591	-1	0.0503443		27240	0.0271348	-1	0.26078
415	0.00525823	1	0.0504874		58473	0.0271853	-1	0.26078
1510	0.00525928	1	0.0504874		79886	0.027043	-1	0.26078
8797	0.00526029	-1	0.0504874		84466	0.0271692	1	0.26078
2046	0.00527117	1	0.0505249		92342	0.0271164	-1	0.26078
4189	0.00526753	-1	0.0505249		114836	0.0272013	-1	0.26078
10944	0.00527371	-1	0.0505249		8447	0.0272673	1	0.261235
2182	0.00528542	-1	0.0505764		4606	0.0273134	1	0.261363
63929	0.00528467	1	0.0505764		254042	0.0273109	1	0.261363
3625	0.00529028	1	0.0505924		6157	0.027353	-1	0.26148
8829	0.00529392	1	0.0505969		8572	0.0273774	-1	0.26148
150365	0.00529773	-1	0.050603		26051	0.0273912	-1	0.26148
4322	0.00531127	1	0.050702		29997	0.0273609	-1	0.26148
9646	0.00532171	-1	0.0507713		4722	0.0274653	-1	0.261827
23081	0.005329	-1	0.0508104		6335	0.0274694	1	0.261827
64175	0.00533758	1	0.0508618		286077	0.0274769	1	0.261827
23208	0.00534198	-1	0.0508733		6392	0.0275393	-1	0.262265
3177	0.00535884	1	0.0509754		493856	0.027584	-1	0.262534
4863	0.0053591	-1	0.0509754		1022	0.0276119	-1	0.262643
943	0.00536673	-1	0.0510175		388021	0.0276928	1	0.263255
79586	0.00537191	1	0.0510256		84243	0.0278326	-1	0.264426
79930	0.00537613	-1	0.0510256		50636	0.0278772	1	0.264535
144535	0.00537833	-1	0.0510256		166785	0.0278653	-1	0.264535
283229	0.00538038	1	0.0510256		7710	0.0279319	1	0.26465
51156	0.00539603	1	0.0511436		51070	0.0279557	-1	0.26465
23361	0.00540961	1	0.0512418		56884	0.0279264	1	0.26465
51059	0.00541733	1	0.0512845		219844	0.0279483	-1	0.26465
9742	0.0054446	1	0.051512		23345	0.0279822	-1	0.264743
51232	0.00545427	-1	0.0515424		292	0.0280309	-1	0.265046
83888	0.00545364	1	0.0515424		157	0.0281105	-1	0.26523
23220	0.00546837	1	0.051645		10235	0.0281015	-1	0.26523
5654	0.00547219	1	0.0516505		10551	0.0280825	1	0.26523
2632	0.00548247	1	0.0516863		23386	0.028146	1	0.26523
23012	0.00547963	1	0.0516863		27010	0.0281497	-1	0.26523
10695	0.00551984	-1	0.0520078		84687	0.0281501	1	0.26523
6513	0.00552631	1	0.0520381		26088	0.0282018	1	0.26556
57537	0.00555583	1	0.0522851		125	0.0282549	-1	0.265612
64131	0.00558224	1	0.0525027		3123	0.0282875	-1	0.265612
53828	0.00560734	1	0.0527076		4118	0.0282906	-1	0.265612
55314	0.00561837	1	0.0527802		4850	0.0282628	-1	0.265612
219790	0.00563374	-1	0.0528935		28960	0.0282614	-1	0.265612
10241	0.00564354	-1	0.0529506		7471	0.0283175	1	0.265632
23062	0.00564647	-1	0.0529506		58515	0.0283261	-1	0.265632
10096	0.00565327	-1	0.0529832		57143	0.0284682	1	0.266808
57730	0.00565965	-1	0.0530119		84419	0.0285008	-1	0.266957
340273	0.00568939	1	0.0532592		2568	0.0285219	-1	0.266997
4293	0.00570488	1	0.0533396		55707	0.0285496	-1	0.2671
9421	0.00570802	1	0.0533396		902	0.0285728	-1	0.267159
153769	0.00570801	1	0.0533396		8797	0.0286733	-1	0.267629
7482	0.00573728	1	0.0535815		11326	0.0286617	-1	0.267629
11094	0.00574461	1	0.0536186		64780	0.028645	-1	0.267629
353299	0.00575689	1	0.0537018		23361	0.0287007	1	0.267728
284252	0.00576205	1	0.0537185		9721	0.0287196	1	0.267748
84958	0.00578157	-1	0.053869		916	0.0288259	-1	0.268111
541565	0.00579756	1	0.0539864		6294	0.0288017	1	0.268111
140766	0.0058059	1	0.0540325		79723	0.0288222	-1	0.268111
10154	0.00582059	-1	0.0541376		147138	0.028823	-1	0.268111
1944	0.00586829	1	0.0545495		27092	0.0288631	1	0.268237
55622	0.0059136	-1	0.0549066		148808	0.0288731	-1	0.268237
165679	0.00591352	1	0.0549066		6160	0.0288982	-1	0.268294
54980	0.00592686	-1	0.0549977		129685	0.0289129	1	0.268294
55311	0.00594171	1	0.0550847		144363	0.0289297	-1	0.268294
65010	0.0059466	1	0.0550847		5641	0.0289575	-1	0.268316
84648	0.00594566	1	0.0550847		112476	0.0289657	1	0.268316
256076	0.0059741	-1	0.0553073		23157	0.0290074	-1	0.268546
10324	0.00598451	1	0.0553715		80125	0.0290636	1	0.26891
2622	0.00599522	1	0.0554322		2919	0.0290955	-1	0.268965
91949	0.00599803	1	0.0554322		23483	0.0291116	-1	0.268965
1411	0.00601243	1	0.0555171		92597	0.0291202	-1	0.268965
84504	0.00601418	1	0.0555171		5880	0.0291691	-1	0.269105
84930	0.00602377	-1	0.0555735		54848	0.0291907	1	0.269105
11157	0.00605394	-1	0.0558195		57176	0.0292029	1	0.269105
8321	0.00610817	1	0.056287		203547	0.0291977	-1	0.269105
11178	0.00611619	1	0.0562958		92399	0.0293049	-1	0.269889
22906	0.00611612	1	0.0562958		2931	0.0293596	1	0.269912
23094	0.00612344	1	0.05633		26046	0.0294089	-1	0.269912
80194	0.00613503	1	0.0563716		57763	0.0293856	-1	0.269912
90480	0.00613201	1	0.0563716		79840	0.0293771	-1	0.269912
7620	0.00614434	1	0.0564126		159963	0.02933	1	0.269912
10439	0.00614657	-1	0.0564126		387509	0.0294085	1	0.269912
200879	0.00615727	1	0.0564783		51586	0.0295693	1	0.271072
10478	0.00617371	1	0.0565965		55362	0.0295572	1	0.271072
715	0.00618685	-1	0.0566843		29775	0.0295951	1	0.271115
2646	0.00619332	1	0.056711		84636	0.0296081	-1	0.271115
10957	0.00619939	-1	0.056734		23780	0.0297681	1	0.271973
7011	0.00620491	-1	0.056752		25913	0.0297395	-1	0.271973
7091	0.00622361	-1	0.0568577		26521	0.0297895	-1	0.271973
195814	0.00622168	1	0.0568577		56941	0.0298065	1	0.271973
2158	0.00622803	1	0.056864		60487	0.0298106	-1	0.271973
114885	0.00623142	-1	0.056864		84525	0.0298275	-1	0.271973
81622	0.00624356	-1	0.0569421		84698	0.029755	1	0.271973
55502	0.00624984	1	0.0569668		92259	0.0298383	-1	0.271973
56145	0.00626418	1	0.0570649		222068	0.0298593	-1	0.27201
9985	0.00627011	-1	0.0570863		7127	0.0298897	-1	0.272131
6123	0.00631417	1	0.0574509		80024	0.0299361	1	0.272398
353274	0.00631737	1	0.0574509		6230	0.0299835	-1	0.272674
79837	0.00632821	1	0.0575167		10412	0.0300082	-1	0.272742
165829	0.00633462	1	0.0575422		7187	0.0300488	-1	0.272956
25813	0.00634781	1	0.0576291		3743	0.0301162	1	0.273413
3344	0.00638531	-1	0.0579334		54819	0.0301456	-1	0.273524
51108	0.00639345	1	0.0579334		10910	0.0301645	-1	0.273539
112495	0.00639586	-1	0.0579334		293	0.0302856	-1	0.273549
353135	0.00639543	1	0.0579334		866	0.0302146	1	0.273549
26575	0.00640396	1	0.0579739		971	0.0302795	-1	0.273549
84103	0.00641383	1	0.0580302		1105	0.0302167	-1	0.273549
92591	0.00644338	1	0.0582587		23411	0.0302483	-1	0.273549
150465	0.00644639	1	0.0582587		79924	0.030253	1	0.273549
60401	0.00645599	1	0.0583124		400569	0.0302697	-1	0.273549
79047	0.00646	1	0.0583155		578	0.0303633	-1	0.273613
254102	0.00650354	-1	0.0586754		51605	0.0303609	-1	0.273613
493911	0.00651943	1	0.0587855		55809	0.0303483	1	0.273613
64147	0.00653059	1	0.0588528		56098	0.0303406	1	0.273613
3949	0.00653851	1	0.0588909		64777	0.0303927	1	0.273613
79723	0.00657446	-1	0.0591813		79663	0.0303957	-1	0.273613
26048	0.00659612	1	0.0593428		5612	0.0304453	-1	0.27375
2517	0.00661056	-1	0.0594056		7321	0.0304423	-1	0.27375
9337	0.00661009	-1	0.0594056		3982	0.0304982	1	0.274071
4158	0.00665722	1	0.0597728		8050	0.030543	-1	0.274221
9021	0.00665891	-1	0.0597728		642273	0.0305493	1	0.274221
2912	0.00666463	1	0.0597823		996	0.0306232	1	0.274346
55531	0.00666748	1	0.0597823		1294	0.0306665	1	0.274346
54576	0.00668128	1	0.0598723		5791	0.0306179	-1	0.274346
340075	0.00671039	1	0.0600994		6000	0.0306566	1	0.274346
2734	0.00671842	1	0.0601376		165545	0.0306576	1	0.274346
84795	0.00672782	1	0.0601879		246184	0.0306466	-1	0.274346
3760	0.00673865	1	0.060251		54873	0.0306967	-1	0.274462
23253	0.00676205	-1	0.0604264		7643	0.0307526	1	0.274808
2932	0.00676874	1	0.0604522		475	0.0308157	-1	0.275216
1521	0.00678559	-1	0.0605349		7644	0.0308327	1	0.275216
5607	0.00678199	1	0.0605349		7871	0.0308814	1	0.275316
79921	0.00679556	1	0.0605899		23505	0.0308958	1	0.275316
256764	0.00680228	1	0.0606159		27197	0.0308662	-1	0.275316
152789	0.00681753	-1	0.0607179		7512	0.0309245	1	0.275418
5407	0.00683612	1	0.0608494		2158	0.0309767	1	0.275422
4544	0.00684147	1	0.0608583		81576	0.0309524	-1	0.275422
283160	0.00684475	1	0.0608583		196294	0.0309746	-1	0.275422
119587	0.00684922	1	0.0608642		340273	0.0310174	1	0.275476
84951	0.0068605	1	0.0609304		388419	0.0310101	1	0.275476
7832	0.00687092	-1	0.060989		231	0.0312774	-1	0.276011
94031	0.00687834	1	0.0610209		966	0.0311809	-1	0.276011
2695	0.00688237	1	0.0610227		5064	0.0311899	1	0.276011
3796	0.00689223	-1	0.0610761		8497	0.0313279	1	0.276011
283159	0.00694272	1	0.0614894		11252	0.0312603	1	0.276011
678	0.00697109	-1	0.0616721		22823	0.0312216	-1	0.276011
7020	0.00697075	1	0.0616721		22862	0.0313093	-1	0.276011
139221	0.00700099	1	0.0618706		23676	0.0312725	-1	0.276011
730755	0.00700129	1	0.0618706		23762	0.0311408	1	0.276011
6916	0.00701046	-1	0.0618831		55216	0.0312029	-1	0.276011
728224	0.00700845	1	0.0618831		58985	0.0311936	1	0.276011
10622	0.00702389	-1	0.0619673		64805	0.0311632	-1	0.276011
25930	0.00703753	1	0.062019		124925	0.0313374	1	0.276011
284948	0.00703487	1	0.062019		256126	0.0311093	1	0.276011
973	0.00705103	-1	0.0621036		441234	0.0313084	1	0.276011
6948	0.00707632	-1	0.0622919		84286	0.0313752	1	0.27604
7189	0.00708806	-1	0.0623608		342979	0.0313621	1	0.27604
25805	0.00711092	1	0.0625275		3601	0.0314517	-1	0.276103
79739	0.00712561	1	0.0626221		5371	0.0314491	-1	0.276103
2070	0.00714418	1	0.0627478		65003	0.0314144	-1	0.276103
6224	0.0071579	1	0.0627478		643988	0.0314439	1	0.276103
8654	0.00715712	1	0.0627478		9919	0.0315102	1	0.27616
90525	0.00715109	1	0.0627478		10314	0.0314876	1	0.27616
256380	0.0071596	-1	0.0627478		285671	0.0315009	-1	0.27616
90529	0.00717178	1	0.06282		728	0.0315565	-1	0.276215
4927	0.0071857	-1	0.0628384		9890	0.0315684	-1	0.276215
27292	0.00718326	-1	0.0628384		90506	0.0315374	1	0.276215
54951	0.00718106	-1	0.0628384		8445	0.0316314	-1	0.276463
91975	0.00720306	1	0.0629557		56252	0.0316167	1	0.276463
7289	0.00729568	1	0.0635882		10287	0.0316777	-1	0.2765
9815	0.00729936	-1	0.0635882		54820	0.0316877	1	0.2765
23386	0.00729755	1	0.0635882		64377	0.0316864	1	0.2765
51072	0.00728772	-1	0.0635882		64794	0.031707	1	0.276517
57611	0.00729508	1	0.0635882		1775	0.0317253	1	0.276525
84254	0.00728095	1	0.0635882		1731	0.0317662	-1	0.276676
11309	0.0073267	-1	0.0637915		84881	0.0317773	-1	0.276676
58191	0.00734497	-1	0.0639157		3105	0.0319309	-1	0.277061
10973	0.00736822	-1	0.064083		4327	0.0319152	1	0.277061
1441	0.00743003	-1	0.064515		10811	0.0319487	1	0.277061
5013	0.00742853	1	0.064515		50805	0.0319387	1	0.277061
125058	0.00742818	1	0.064515		51684	0.0318879	1	0.277061
5592	0.00748857	1	0.0649879		65268	0.0319431	1	0.277061
5446	0.00749331	1	0.0649937		79948	0.0319606	1	0.277061
1952	0.00750213	1	0.0650347		81793	0.0319383	-1	0.277061
9507	0.00753434	1	0.0651723		780	0.0319983	1	0.277238
51744	0.00752931	-1	0.0651723		2350	0.0321301	-1	0.277401
55266	0.00753318	-1	0.0651723		3431	0.0321273	-1	0.277401
55806	0.00752648	1	0.0651723		3557	0.0321563	-1	0.277401
5738	0.00758151	1	0.0655447		4615	0.0321543	-1	0.277401
521	0.00769029	1	0.0663771		51564	0.0320916	1	0.277401
5501	0.00768706	-1	0.0663771		113235	0.0321033	1	0.277401
114783	0.0076862	1	0.0663771		116071	0.0321208	-1	0.277401
2671	0.00769457	1	0.0663782		145501	0.0320487	1	0.277401
54857	0.00772762	1	0.0666272		283638	0.0321919	1	0.277557
10911	0.00773496	-1	0.0666544		1995	0.0323474	1	0.277721
108	0.00776039	1	0.0668375		2963	0.0323665	-1	0.277721
11107	0.00779095	1	0.0670644		4602	0.0323216	1	0.277721
5409	0.00781731	1	0.067255		6222	0.0323154	-1	0.277721
23366	0.00783167	1	0.0673423		51399	0.0322819	-1	0.277721
6102	0.00786243	-1	0.0675702		113402	0.0322716	-1	0.277721
1618	0.00788974	-1	0.0677684		145483	0.032354	1	0.277721
576	0.00791541	1	0.0679196		170960	0.0323638	-1	0.277721
79807	0.00791586	1	0.0679196		375035	0.0323677	-1	0.277721
4486	0.00793744	1	0.0680571		9445	0.0324416	-1	0.278057
6525	0.00794452	1	0.0680571		56670	0.0324417	-1	0.278057
8784	0.00794896	-1	0.0680571		4610	0.0324717	-1	0.278165
388662	0.00794631	1	0.0680571		3577	0.0324992	1	0.27825
23314	0.00796054	1	0.0681197		4938	0.0325529	-1	0.278561
84678	0.00797239	-1	0.0681845		10946	0.0326059	-1	0.278806
287	0.00799175	-1	0.0682593		11097	0.0326165	-1	0.278806
2677	0.00799081	1	0.0682593		4486	0.0326547	1	0.278822
9407	0.00799471	1	0.0682593		112950	0.0326884	-1	0.278822
84864	0.00799827	-1	0.0682593		148345	0.0326819	1	0.278822
25759	0.00800934	1	0.0683173		197335	0.0326688	1	0.278822
58986	0.00802144	1	0.0683839		1738	0.0327489	-1	0.279047
6692	0.00803033	1	0.0683865		9406	0.0327498	-1	0.279047
124152	0.00802876	1	0.0683865		9656	0.0327747	1	0.27911
186	0.00803957	1	0.0684286		4661	0.0328351	1	0.279475
84888	0.00804614	-1	0.068448		354	0.033149	1	0.28035
222	0.00805287	1	0.0684582		1756	0.0330522	-1	0.28035
221393	0.00805592	1	0.0684582		3560	0.033092	-1	0.28035
3281	0.00807796	1	0.0685761		3757	0.0331303	1	0.28035
60672	0.0080784	-1	0.0685761		4861	0.0331174	1	0.28035
28984	0.0080906	-1	0.0686431		6155	0.033126	-1	0.28035
64428	0.00810659	1	0.0687422		7164	0.0330005	-1	0.28035
8131	0.0081548	1	0.0691142		8463	0.0331443	-1	0.28035
57605	0.00817249	1	0.0692273		8646	0.0330915	1	0.28035
4632	0.00821065	1	0.0695137		23433	0.0330007	-1	0.28035
116412	0.00824356	1	0.0697552		132299	0.0329633	-1	0.28035
57620	0.00825402	-1	0.0697942		197135	0.0330122	-1	0.28035
80740	0.00825693	1	0.0697942		51400	0.0331754	1	0.280425
79772	0.00826581	-1	0.0698323		2014	0.0332512	-1	0.280661
5774	0.00828679	1	0.0698615		2531	0.0333617	-1	0.280661
6954	0.00828181	1	0.0698615		3092	0.0332874	1	0.280661
8722	0.00828306	1	0.0698615		6159	0.0333185	-1	0.280661
140680	0.00828138	1	0.0698615		6813	0.0333493	1	0.280661
4222	0.00830804	-1	0.0700036		6900	0.0333231	1	0.280661
64122	0.00832811	1	0.0701357		51365	0.0333469	-1	0.280661
54551	0.00835199	1	0.0702625		56171	0.0332747	1	0.280661
148789	0.00835142	1	0.0702625		202374	0.0333151	1	0.280661
8720	0.00836998	1	0.0703767		57567	0.0334015	-1	0.2807
79026	0.00838256	1	0.0704453		199990	0.0333915	1	0.2807
254240	0.00839735	1	0.0705324		55691	0.0334713	-1	0.281138
21	0.00840886	1	0.0705919		2566	0.0335016	1	0.281244
134549	0.00842247	1	0.0706689		56985	0.0335344	-1	0.281311
134121	0.00843969	1	0.0707762		65008	0.0335449	-1	0.281311
10553	0.00844462	-1	0.0707803		51411	0.033582	-1	0.281364
652	0.0084777	1	0.0709829		121536	0.0335864	-1	0.281364
3841	0.00847576	-1	0.0709829		2778	0.03364	1	0.281382
2817	0.00851555	1	0.071225		23081	0.0336331	-1	0.281382
201305	0.00851277	-1	0.071225		126364	0.0336416	-1	0.281382
3626	0.00852864	1	0.0712668		57221	0.0337336	1	0.282004
26232	0.00852948	-1	0.0712668		522	0.0338871	-1	0.282121
284023	0.00855016	1	0.0714021		1727	0.0339405	1	0.282121
11234	0.00855753	-1	0.0714263		1770	0.0338201	1	0.282121
79659	0.00856761	1	0.0714355		10663	0.0339095	-1	0.282121
641649	0.00856668	1	0.0714355		11006	0.0339777	-1	0.282121
80700	0.00857211	1	0.0714357		11184	0.033889	-1	0.282121
113026	0.00858112	1	0.0714735		29889	0.0339756	-1	0.282121
5745	0.00862613	1	0.0718044		54476	0.0338807	1	0.282121
6721	0.00862986	1	0.0718044		64806	0.0339195	1	0.282121
11344	0.00865097	-1	0.0719064		114781	0.0338173	1	0.282121
114899	0.00865114	1	0.0719064		131368	0.0339039	1	0.282121
8341	0.00865826	1	0.0719264		133686	0.033958	1	0.282121
9895	0.00866257	1	0.0719264		257415	0.033893	-1	0.282121
23452	0.0086724	1	0.0719705		54877	0.0340056	-1	0.282206
11099	0.00874462	1	0.0725321		941	0.0340337	-1	0.282292
79784	0.00875721	1	0.0725988		23567	0.0340637	1	0.282394
84627	0.00876801	1	0.0726505		80380	0.0341187	-1	0.282702
6361	0.008795	-1	0.0727985		83608	0.0342117	-1	0.283326
89944	0.00879247	1	0.0727985		85365	0.0342743	-1	0.283698
285601	0.00881532	1	0.0729288		120425	0.0343145	-1	0.283883
2853	0.00883957	1	0.0729998		140683	0.0343708	1	0.284201
8884	0.00883547	-1	0.0729998		7535	0.0344276	-1	0.2843
84779	0.00883064	1	0.0729998		23295	0.0344157	1	0.2843
117196	0.00884221	1	0.0729998		158747	0.0344363	-1	0.2843
8484	0.00884691	1	0.0730007		3945	0.0344607	-1	0.284354
163255	0.00885426	1	0.0730236		3055	0.0345238	-1	0.284727
665	0.00887329	1	0.0731427		11317	0.0345491	1	0.284789
2992	0.00889148	-1	0.0732547		63874	0.0346182	1	0.285064
55120	0.00890757	-1	0.0733495		341880	0.0346105	1	0.285064
26011	0.00891992	1	0.0734132		221154	0.0346715	-1	0.285355
127254	0.00893619	-1	0.0735091		2128	0.034693	1	0.285385
2014	0.00897489	-1	0.0737894		57863	0.0347419	1	0.285493
51626	0.00901648	1	0.074055		266977	0.0347254	1	0.285493
203522	0.00901335	-1	0.074055		8665	0.0347778	-1	0.285493
284076	0.00905493	1	0.0743325		58516	0.0347669	-1	0.285493
126308	0.00907495	-1	0.0744585		84458	0.0348135	1	0.285565
27133	0.00908656	1	0.0744974		148423	0.0348224	-1	0.285565
83636	0.00908903	-1	0.0744974		128853	0.0348467	1	0.285617
22907	0.00909807	1	0.0745331		79441	0.0348912	-1	0.2858
4893	0.00911714	-1	0.074651		286262	0.0349048	1	0.2858
26063	0.00912675	1	0.0746913		84939	0.0349332	1	0.285885
89846	0.00915071	-1	0.074849		3430	0.0349782	-1	0.286107
4597	0.00915833	1	0.0748729		313	0.035037	-1	0.286441
3624	0.00916917	1	0.0748847		57477	0.0351933	1	0.287424
9465	0.00916712	-1	0.0748847		84717	0.0351902	1	0.287424
51550	0.00918045	1	0.0749384		2166	0.0354832	1	0.287471
192134	0.00919407	1	0.0750112		2937	0.0353715	1	0.287471
89874	0.0092156	1	0.07511		5971	0.035431	-1	0.287471
285382	0.00921282	1	0.07511		6018	0.0353536	-1	0.287471
2000	0.00922959	-1	0.0751856		6814	0.0352705	-1	0.287471
8464	0.00925073	-1	0.0753193		8454	0.0354461	-1	0.287471
146857	0.00926933	-1	0.0753937		8800	0.0354706	1	0.287471
283471	0.00926839	1	0.0753937		25988	0.035471	-1	0.287471
51477	0.0092757	1	0.075407		57001	0.035243	-1	0.287471
2561	0.00928044	1	0.0754072		57633	0.0354482	-1	0.287471
145508	0.00931804	-1	0.0756741		60412	0.0352507	-1	0.287471
1945	0.00938238	1	0.0761578		80025	0.0354092	-1	0.287471
140688	0.00939129	-1	0.0761913		83894	0.0354875	1	0.287471
23327	0.00942335	1	0.0764126		116461	0.0352908	-1	0.287471
2572	0.00943584	1	0.0764749		120224	0.0353537	1	0.287471
4355	0.0094806	1	0.0767987		124401	0.0354187	1	0.287471
374918	0.00949732	1	0.076895		375	0.0359053	1	0.287699
11168	0.00951926	-1	0.0770244		535	0.0359343	1	0.287699
401612	0.00952297	-1	0.0770244		883	0.0358154	1	0.287699
2638	0.00954426	1	0.0771153		989	0.0356159	-1	0.287699
146540	0.0095404	1	0.0771153		1429	0.035774	-1	0.287699
199221	0.00954871	1	0.0771153		1964	0.0360195	-1	0.287699
84940	0.00955655	1	0.0771395		3955	0.0357195	1	0.287699
6553	0.00956172	1	0.0771422		4869	0.0360428	-1	0.287699
130074	0.00957488	1	0.0772093		4899	0.0358841	-1	0.287699
57545	0.0096045	1	0.077409		5997	0.0356532	-1	0.287699
6480	0.00961734	-1	0.0774733		6497	0.0359272	1	0.287699
5236	0.00963088	1	0.0775432		8446	0.0359619	-1	0.287699
4130	0.00965392	1	0.0776503		9488	0.0361175	-1	0.287699
100506127	0.00965211	1	0.0776503		9925	0.0361834	-1	0.287699
8897	0.00970713	1	0.0780388		10268	0.0361315	-1	0.287699
56912	0.0097663	1	0.0784354		10550	0.0360977	-1	0.287699
219970	0.00976331	1	0.0784354		10634	0.0359655	1	0.287699
57799	0.00978378	1	0.0785362		11142	0.0360487	-1	0.287699
23491	0.00979393	1	0.0785782		26211	0.0360933	1	0.287699
2827	0.00980432	1	0.0786219		26515	0.0358543	-1	0.287699
144406	0.00983619	1	0.0788379		27112	0.0358964	1	0.287699
92369	0.0098487	1	0.0788985		30836	0.0358582	-1	0.287699
978	0.00986069	1	0.0789455		51654	0.0359416	-1	0.287699
283150	0.00986448	1	0.0789455		54093	0.0361257	-1	0.287699
1132	0.00991727	1	0.0793282		56548	0.0359729	-1	0.287699
3221	0.00995223	1	0.0795679		57585	0.0357953	1	0.287699
79174	0.00996547	-1	0.0796338		58491	0.0359937	-1	0.287699
350	0.00997054	1	0.0796344		81627	0.0361721	-1	0.287699
79899	0.0100178	-1	0.0799717		114770	0.0360244	-1	0.287699
[truncated: 13,945 more rows]
